# Supplementary material
Source: publisher figshare collection journal article supplement (https://acs.figshare.com/ndownloader/files/4765027)
Supplement: Supplementary file 1 [file 4765027]

# Supporting Information

## Linchpin Synthons: Metallation of Aryl Halides Bearing a Proximal Trifluoroborate Moiety

*Gary A. Molander\* and Noel M. Ellis*

Roy and Diana Vagelos Laboratories, Department of Chemistry, University of  
Pennsylvania,

Philadelphia, Pennsylvania 19104-6323

### **Contents:**

|                                      |     |
|--------------------------------------|-----|
| General Experimental Procedure ..... | S2  |
| Compound Characterization .....      | S3  |
| NMR spectra .....                    | S10 |

**General.** *n*-BuLi was used as a 2.5 M solution in hexanes purchased commercially and stored at 3 °C. All boronic acids and aldehydes were obtained from commercial sources and used without further purification. Solvents were distilled from sodium/benzophenone prior to use. Standard benchtop techniques were employed for handling air-sensitive reagents. Melting points (°C) were determined using a Thomas-Hoover melting point apparatus and are uncorrected. <sup>1</sup>H, <sup>13</sup>C, and <sup>19</sup>F NMR spectra were recorded on a 500 MHz spectrometer. <sup>11</sup>B NMR spectra were recorded on a 400 MHz spectrometer with appropriate decoupling accessories. Compounds **1**<sup>2</sup>, **2**<sup>1</sup>, and **23**<sup>2</sup> were prepared according to known literature procedures. They are also commercially available.

**General Experimental Procedure for the Lithium-Halogen Exchange of Potassium Bromoaryl Trifluoroborates. Preparation of Potassium 4-(1-Hydroxypropyl)phenyl Trifluoroborate.** To an oven-dried round bottom flask (50 mL) was added *p*-bromophenyl trifluoroborate (262 mg, 1.0 mmol). The flask was evacuated and back-filled with N<sub>2</sub> three times before adding freshly distilled THF (10 mL). A Dry Ice/ acetone bath was then used to cool the reaction to –78 °C and *n*-BuLi (1.0 mmol) was added dropwise. The reaction was then left to stir at –78 °C for 1 h, during which time an insoluble salt precipitated. Next, neat propionaldehyde (58 mg, 1.0 mmol) was added dropwise, and stirring was continued for an additional 10 min at –78 °C. After warming to rt, the reaction was stirred for 30 min, then sat. KHF<sub>2</sub> (aq) (390 mg, 5.0 mmol) was added, and the reaction was stirred at rt for an additional 10 min. Evaporation of the

solvent *in vacuo* was followed by drying at 0.05 torr for a minimum of 6 h. Acetone extraction (3 x 20 mL) and filtration of the solids gave a solution of the product trifluoroborate in acetone. Reduction of the solvent followed by dropwise addition of Et<sub>2</sub>O led to precipitation of the product. The product was then filtered, collected, and dried overnight at 0.05 torr to afford potassium 4-(1-hydroxypropyl)phenyl trifluoroborate (212 mg, 88%).

#### Compound Characterization:

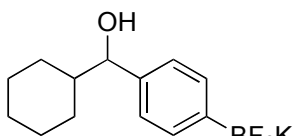

**4-(Cyclohexyl(hydroxy)methyl)phenyl Trifluoroborate (4).**

According to the general procedure, the product was obtained in 84% yield (250 mg, 0.84 mmol) as a white crystalline solid after acetone/Et<sub>2</sub>O precipitation. mp > 250 °C. <sup>1</sup>H-NMR (500 MHz, DMSO-*d*<sub>6</sub>): 7.27 (d, *J* = 7.9 Hz, 2H), 6.96 (d, *J* = 7.9 Hz, 2H), 4.77 (d, *J* = 4.4 Hz, 1H), 4.13 (dd, *J* = 6.8, 4.4 Hz, 1H), 1.86 (d, *J* = 12.8 Hz, 1H), 1.66 (d, *J* = 12.5 Hz, 1H), 1.57 (s, 2H), 1.44 (m, 1H), 1.35 (d, *J* = 12.3 Hz, 1H), 1.13 (m, 3H), 0.93 (m, 2H); <sup>13</sup>C-NMR (125.8 MHz, DMSO-*d*<sub>6</sub>): 141.1, 130.6, 124.6, 77.6, 45.0, 29.1, 28.5, 26.2, 25.8, 25.7; <sup>19</sup>F-NMR (471 MHz, DMSO-*d*<sub>6</sub>): -139.1; <sup>11</sup>B-NMR (128.37 MHz, DMSO-*d*<sub>6</sub>): 4.07; IR (KBr) = 3539, 2914, 2852 cm<sup>-1</sup>; HRMS (ESI) calcd. for C<sub>13</sub>H<sub>17</sub>BF<sub>3</sub>O (M<sup>+</sup>) 257.1324, found 257.1340.

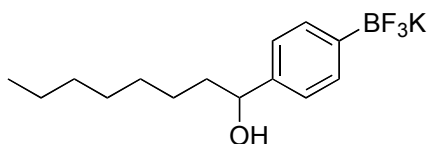

**4-(1-Hydroxyoctyl)phenyl Trifluoroborate (6).**

According to the general procedure, the product was obtained in 87% yield (270 mg, 0.87 mmol) as a white crystalline solid after acetone/Et<sub>2</sub>O precipitation. mp > 250 °C. <sup>1</sup>H-NMR (500 MHz, DMSO-*d*<sub>6</sub>): 7.26 (d, *J* = 7.9 Hz, 2H), 7.02 (d, *J* = 7.9 Hz, 2H), 4.79 (d, *J* = 4 Hz, 1H), 4.37 (m, 1H), 1.58 (m, 1H), 1.65 (m, 1H), 1.23 (m, 10 H), 0.88 (t, *J* = 6.6 Hz, 3H); <sup>13</sup>C-NMR (125.8 MHz, DMSO-*d*<sub>6</sub>): 142.6, 130.9, 123.9, 72.8, 39.5, 31.3, 29.1, 28.8, 25.5, 22.1, 13.9; <sup>19</sup>F-NMR (471 MHz, DMSO-*d*<sub>6</sub>): -139.1; <sup>11</sup>B-NMR (128.37 MHz, DMSO-*d*<sub>6</sub>): 3.78 ; IR (KBr) = 3392, 2924, 2854 cm<sup>-1</sup>; HRMS (ESI) calcd. for C<sub>14</sub>H<sub>21</sub>BF<sub>3</sub>O (M<sup>+</sup>) 273.1638, found 273.1638.

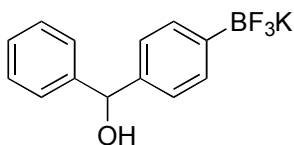

**4-(Hydroxy(phenyl)methyl)phenyl Trifluoroborate (8).**

According to the general procedure, the product was obtained in 69% yield (200 mg, 0.69 mmol) as a white crystalline solid after acetone/Et<sub>2</sub>O precipitation. mp > 250 °C. <sup>1</sup>H-NMR (500 MHz, DMSO-*d*<sub>6</sub>): 7.36 (d, *J* = 7.7 Hz, 2H), 7.26 (m, 4H), 7.17 (m, 1H), 7.08 (d, *J* = 7.7 Hz, 2H), 5.61 (d, *J* = 4 Hz, 1H), 5.59 (d, *J* = 4 Hz, 1H); <sup>13</sup>C-NMR (125.8 MHz, acetone-*d*<sub>6</sub>): 146.4, 142.0, 131.0, 127.8, 126.3, 126.2, 124.4, 74.7; <sup>19</sup>F-NMR (471 MHz, DMSO-*d*<sub>6</sub>): -139.3; <sup>11</sup>B-NMR (128.37 MHz, DMSO-*d*<sub>6</sub>): 2.82; IR (KBr) = 3527, 3032, 2891 cm<sup>-1</sup>; HRMS (ESI) calcd. for C<sub>13</sub>H<sub>11</sub>BF<sub>3</sub>O (M<sup>+</sup>) 251.0855, found 251.0858.

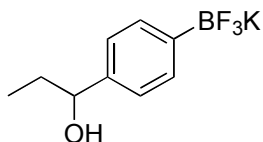

**4-(1-Hydroxypropyl)phenyl Trifluoroborate (10).** According to the general procedure, the product was obtained in 88% yield (212 mg, 0.88 mmol) as a white crystalline solid after acetone/Et<sub>2</sub>O precipitation. mp > 250 °C. <sup>1</sup>H-NMR (500 MHz, DMSO-*d*<sub>6</sub>): 7.26 (d, *J* =

7.8 Hz, 2H), 7.0 (d, *J* = 7.8 Hz, 2H), 4.82 (m, 1H), 4.31 (m, 1H), 1.58 (m, 2H), 0.80 (t, *J* = 7 Hz, 3H); <sup>13</sup>C-NMR (125.8 MHz, DMSO-*d*<sub>6</sub>): 142.3, 130.9, 123.9, 74.2, 32.1, 10.3; <sup>19</sup>F-NMR (471 MHz, DMSO-*d*<sub>6</sub>): -139.2 ; <sup>11</sup>B-NMR (128.37 MHz, DMSO-*d*<sub>6</sub>): 3.37 ; IR (KBr) = 3403, 2964 cm<sup>-1</sup>; HRMS (ESI) calcd. for C<sub>9</sub>H<sub>11</sub>OBF<sub>3</sub> (M<sup>-</sup>) 203.0855, found 203.0845.

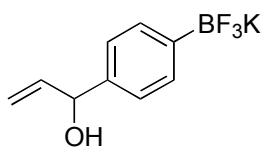

**4-(1-Hydroxyallyl)phenyl Trifluoroborate (12).** According to the general procedure, the product was obtained in 94% yield (225 mg, 0.94 mmol) as a white crystalline solid that was 95% pure after acetone/Et<sub>2</sub>O precipitation. mp > 250 °C. <sup>1</sup>H-NMR (500 MHz, acetone-*d*<sub>6</sub>): 7.45 (d, *J* = 8 Hz, 2H), 7.12 (d, *J* = 8 Hz, 2H), 5.99 (ddd, *J* = 16.5, 10.3, 5.7 Hz, 1H), 5.25 (m, 1H), 5.06 (s, 1H), 5.00 (m, 1H), 4.16 (d, *J* = 4.5 Hz, 1H); <sup>13</sup>C-NMR (125.8 MHz, acetone-*d*<sub>6</sub>): 142.5, 140.8, 131.5, 124.5, 112.1, 74.9; <sup>19</sup>F-NMR (471 MHz, acetone-*d*<sub>6</sub>): -142.6 ; <sup>11</sup>B-NMR (128.37 MHz, acetone-*d*<sub>6</sub>): 3.77 ; IR (KBr) = 3394, 3017, 2874, 1939 cm<sup>-1</sup>; HRMS (ESI) calcd. for C<sub>9</sub>H<sub>9</sub>BF<sub>3</sub>O (M<sup>-</sup>) 201.0698, found 201.0697.

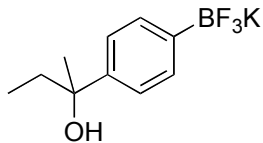

**4-(2-Hydroxy-2-butanyl)phenyl Trifluoroborate (14).** According to the general procedure, the product was obtained in 83% yield (212 mg, 0.83 mmol) as a white crystalline solid after acetone/Et<sub>2</sub>O precipitation. mp > 250 °C. <sup>1</sup>H-NMR (500 MHz, DMSO-*d*<sub>6</sub>): 7.25 (d, *J* = 7.34 Hz, 2H), 7.13 (d, *J* = 7.34 Hz, 2H), 4.51 (s, 1H), 1.65 (m, 2H), 1.36 (s, 3H), 0.68 (t, *J* = 7.34 Hz, 3H); <sup>13</sup>C-NMR (125.8 MHz, DMSO-*d*<sub>6</sub>): 145.1, 130.6, 122.9, 72.9, 36.6,

29.8, 8.5; <sup>19</sup>F-NMR (471 MHz, DMSO-*d*<sub>6</sub>): -139.6; <sup>11</sup>B-NMR (128.37 MHz, DMSO-*d*<sub>6</sub>): 3.80; IR (KBr) = 3430, 2974, 2937 cm<sup>-1</sup>; HRMS (ESI) calcd. for C<sub>10</sub>H<sub>13</sub>BF<sub>3</sub>O (M<sup>+</sup>) 217.1011, found 217.1014.

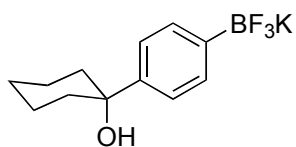

**4-(Hydroxycyclohexyl)phenyl Trifluoroborate (16).** According to the general procedure, the product was obtained in 65% yield (183 mg, 0.65 mmol) as a white crystalline solid in 95% purity after acetone/Et<sub>2</sub>O precipitation. mp > 250 °C. <sup>1</sup>H-NMR (500 MHz, acetone-*d*<sub>6</sub>): 7.41 (d, *J* = 7.9 Hz, 2H), 7.26 (d, *J* = 7.9 Hz, 2H), 3.26 (s, 1H), 1.80 (m, 4H), 1.68 (m, 3H), 1.52 (m, 2H), 1.29 (m, 1H); <sup>13</sup>C-NMR (125.8 MHz, acetone-*d*<sub>6</sub>): 148.0, 132.2, 123.5, 72.9, 40.0, 26.7, 23.1; <sup>19</sup>F-NMR (471 MHz, acetone-*d*<sub>6</sub>): -142.7; <sup>11</sup>B-NMR (128.37 MHz, acetone-*d*<sub>6</sub>): 3.94; IR (KBr) = 3434, 2930, 2858 cm<sup>-1</sup>; HRMS (ESI)

calcd. for  $C_{12}H_{15}BF_3O$  ( $M^-$ ) 243.1168, found 243.1178.

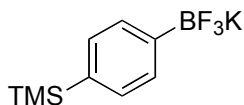

**4-(Trimethylsilyl)phenyl Trifluoroborate (18).** According to the general procedure, the product was obtained in 68% yield (172 mg, 0.68 mmol) as a white crystalline solid after acetone/ $Et_2O$  precipitation. mp > 250 °C.  $^1H$ -NMR (500 MHz, acetone- $d_6$ ): 7.47 (d,  $J$  = 7.3 Hz, 2H), 7.29 (d,  $J$  = 7.3 Hz, 2H), 0.20 (s, 9H);  $^{13}C$ -NMR (125.8 MHz, acetone- $d_6$ ): 136.2, 132.2, 132.1, -0.8;  $^{19}F$ -NMR (471 MHz, acetone- $d_6$ ): -143.1;  $^{11}B$ -NMR (128.37 MHz, acetone- $d_6$ ): 3.59; IR (KBr) = 3638, 3054, 2959  $cm^{-1}$ ; HRMS (ESI) calcd. for  $C_9H_{13}BF_3Si$  ( $M^-$ ) 217.0831, found 217.0835.

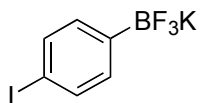

**4-Iodophenyl Trifluoroborate (20).** According to the general procedure, the product was obtained in 64% yield (198 mg, 0.64 mmol) as a white crystalline solid that was 90% pure after acetone/ $Et_2O$  precipitation. mp > 250 °C.  $^1H$ -NMR (500 MHz, DMSO- $d_6$ ): 7.45 (d,  $J$  = 7.6 Hz, 2H), 7.14 (d,  $J$  = 7.6 Hz, 2H);  $^{13}C$ -NMR (125.8 MHz, DMSO- $d_6$ ): 134.9, 133.9, 91.4;  $^{19}F$ -NMR (471 MHz, acetone- $d_6$ ): -140.1;  $^{11}B$ -NMR (128.37 MHz, acetone- $d_6$ ): 3.50; IR (KBr) = 3660, 3030, 2926  $cm^{-1}$ ; HRMS (ESI) calcd. for  $C_6H_4BF_3I$  ( $M^-$ ) 270.9402, found 270.9390.

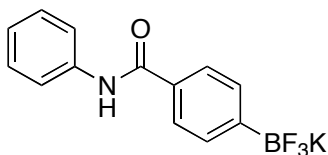

**4-(Phenylcarbamoyl)phenyl Trifluoroborate (22).** According

to the general procedure, the product was obtained in 68% yield (208 mg, 0.68 mmol) as a white crystalline solid after acetone/Et<sub>2</sub>O precipitation. mp > 250 °C. <sup>1</sup>H-NMR (500 MHz, DMSO-*d*<sub>6</sub>): 10.01 (s, 1H), 7.79 (d, *J* = 8.1 Hz, 2H), 7.73 (d, *J* = 7.7 Hz, 2H), 7.47 (d, *J* = 7.7 Hz, 2H), 7.33 (m, 2H), 7.07 (m, 1H); <sup>13</sup>C-NMR (125.8 MHz, DMSO-*d*<sub>6</sub>): 166.9, 140.0, 132.1, 131.6, 129.0, 126.1, 123.7, 120.7; <sup>19</sup>F-NMR (471 MHz, DMSO-*d*<sub>6</sub>): -140.0; <sup>11</sup>B-NMR (128.37 MHz, DMSO-*d*<sub>6</sub>): 3.66 ; IR (KBr) = 3057, 1944 cm<sup>-1</sup>; HRMS (ESI) calcd. for C<sub>13</sub>H<sub>10</sub>BF<sub>3</sub>NO (M<sup>+</sup>) 264.0808, found 264.0817.

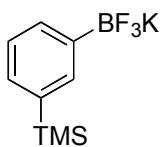

**3-(Trimethylsilyl)phenyl Trifluoroborate (24).** To a stirring solution of *m*-

bromophenyl trifluoroborate (262 mg, 1.0 mmol ) in THF at -78 °C was added dropwise a solution of *t*-BuLi in pentane (2.0 mmol). The mixture was stirred for 10 minutes, at which point neat TMSCl (109 mg, 1 mmol) was added dropwise and the reaction was allowed to warm to rt. After stirring for 30 minutes, a saturated solution of KHF<sub>2</sub> (aq) (390 mg, 5.0 mmol) was added and the mixture was kept stirring for 10 minutes before removing the solvents *in vacuo* and subjecting the resulting solids to a vacuum of 0.05 torr for a minimum of 6 h. Acetone extraction (3 x 20 mL) and filtration of the solids gave a solution of the product trifluoroborate in acetone. Reduction of the acetone followed by dropwise addition of Et<sub>2</sub>O led to precipitation of the product. The product was obtained in 81% yield (208 mg, 0.81 mmol) as a white crystalline solid upon filtration. mp > 250 °C. <sup>1</sup>H-NMR (500 MHz, acetone-*d*<sub>6</sub>): 7.72 (s, 1H), 7.48 (d, *J* = 7.15 Hz, 1H), 7.24 (d, *J* = 7.5 Hz, 1H), 7.09 (t, *J* = 7.5 Hz, 1H), 0.21 (s, 9H); <sup>13</sup>C-NMR (125.8



MHz, acetone- $d_6$ ): 136.7, 132.5, 130.1, 125.7;  $^{19}\text{F}$ -NMR (471 MHz, acetone- $d_6$ ): -142.9;  
 $^{11}\text{B}$ -NMR (128.37 MHz, acetone- $d_6$ ): 3.72; IR (KBr) = 2958, 2896  $\text{cm}^{-1}$ ; HRMS (ESI)  
calcd. for  $\text{C}_9\text{H}_{13}\text{BF}_3\text{Si}(\text{M})^-$  217.0832, found 217.0826.

## References:

- (1) Vedejs, E.; Chapman, R. W.; Fields, S.C.; Lin, S.; Schrimpf, M. R. *J. Org. Chem.* **1995**, 60, 3020-3027.
- (2) Darses, S.; Michaud, G.; Genêt, J-P. *Eur. J. Org. Chem.* **1999**, 1875-1883.

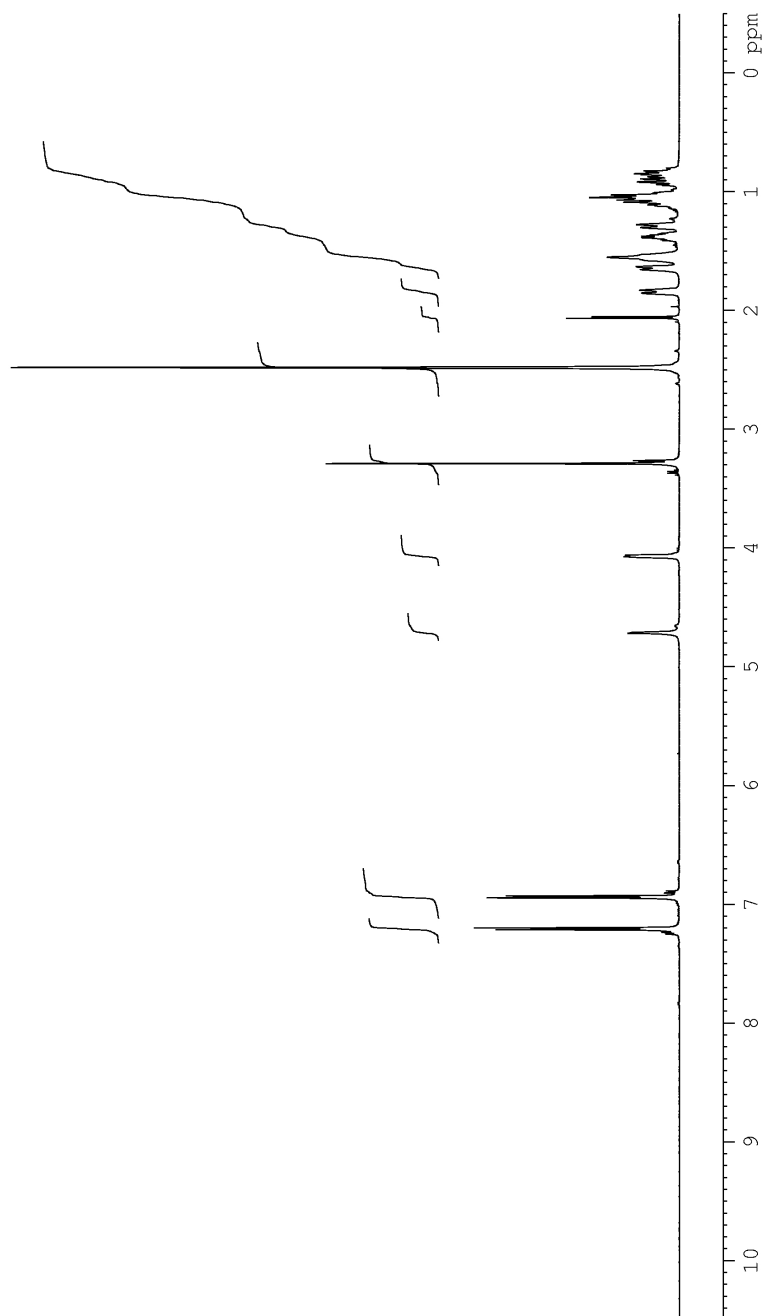

$^1\text{H}$  NMR Spectrum of 4-(Cyclohexyl(hydroxy)methyl)phenyl Trifluoroborate (**4**)

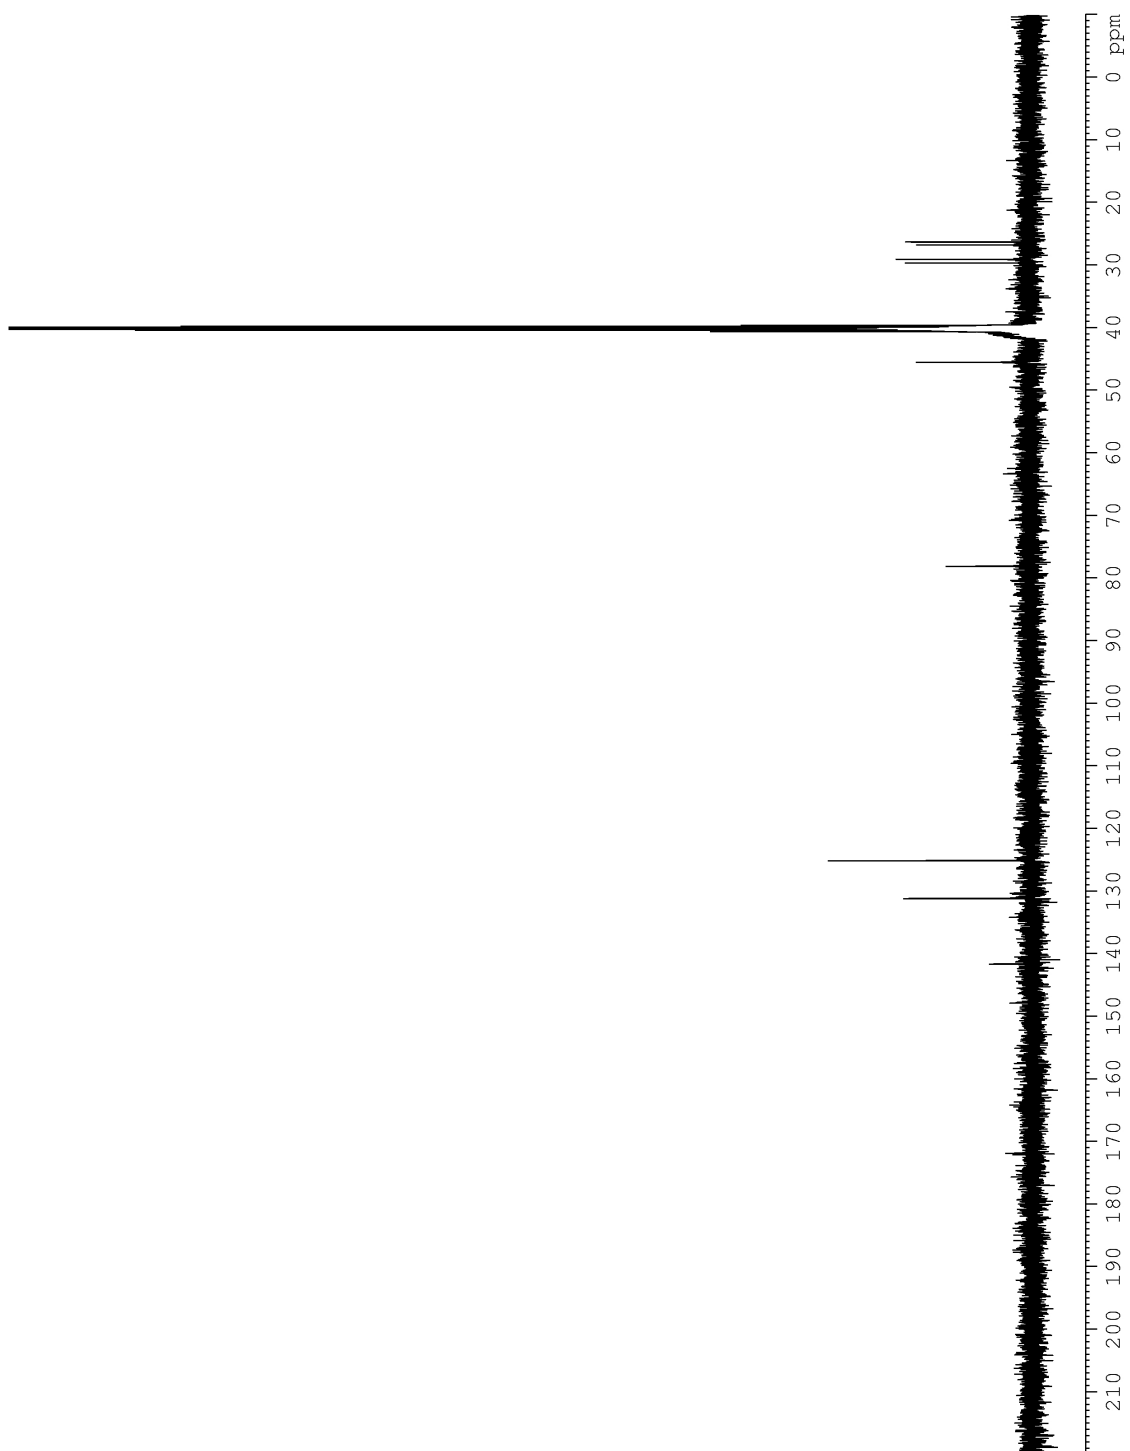

$^{13}\text{C}$  NMR Spectrum of 4-(Cyclohexyl(hydroxy)methyl)phenyl Trifluoroborate (4)

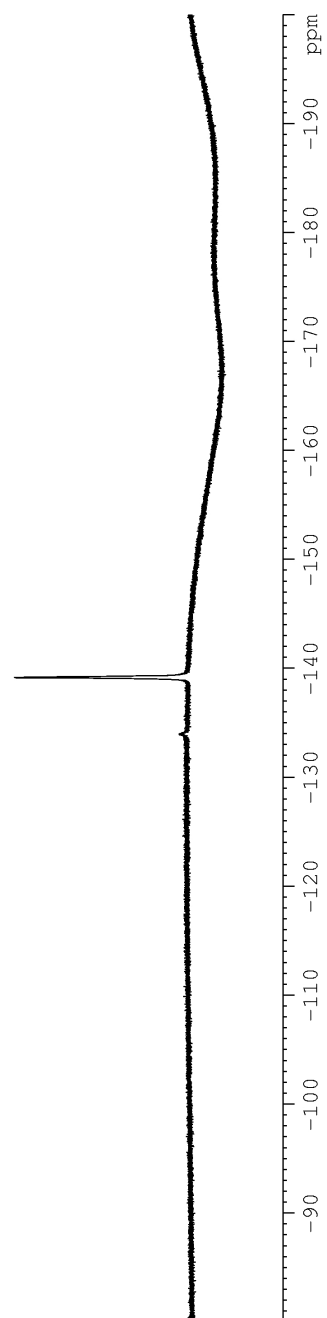

$^{19}\text{F}$  NMR Spectrum of 4-(Cyclohexyl(hydroxy)methyl)phenyl Trifluoroborate (**4**)

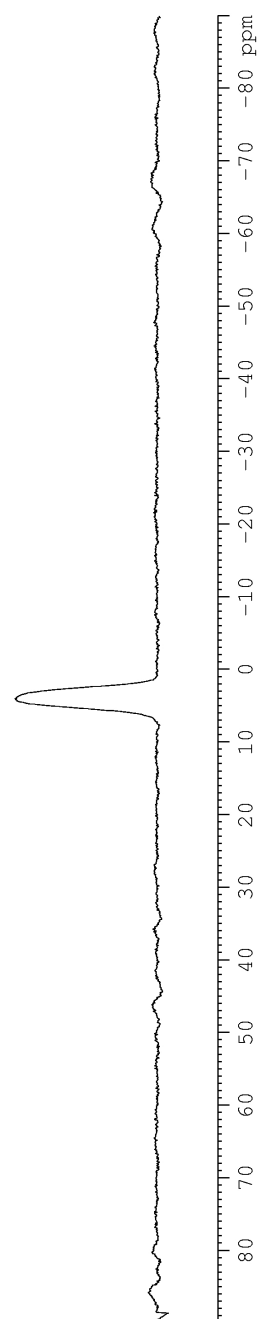

$^{11}\text{B}$  NMR Spectrum of 4-(Cyclohexyl(hydroxy)methyl)phenyl Trifluoroborate (**4**)

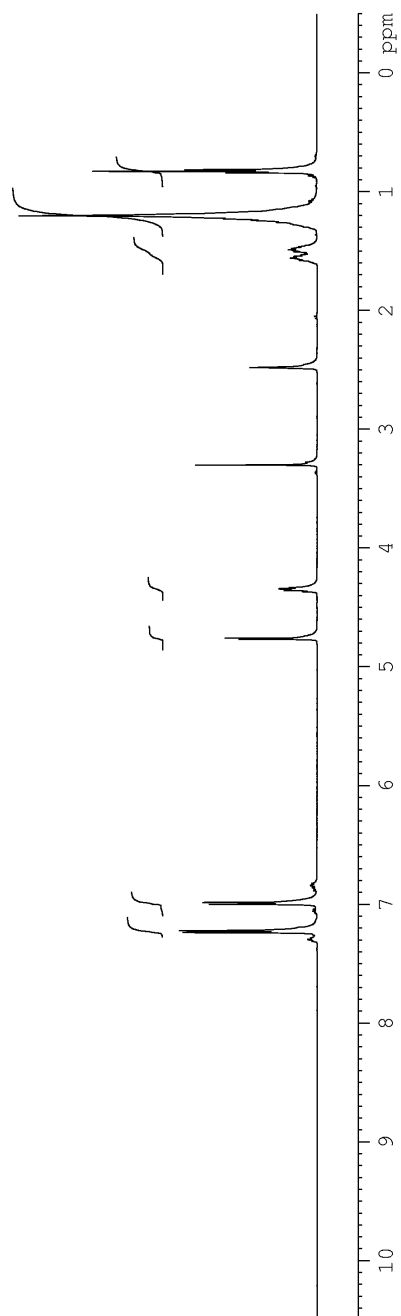

$^1\text{H}$  NMR Spectrum of 4-(1-Hydroxyoctyl)phenyl Trifluoroborate (**6**)

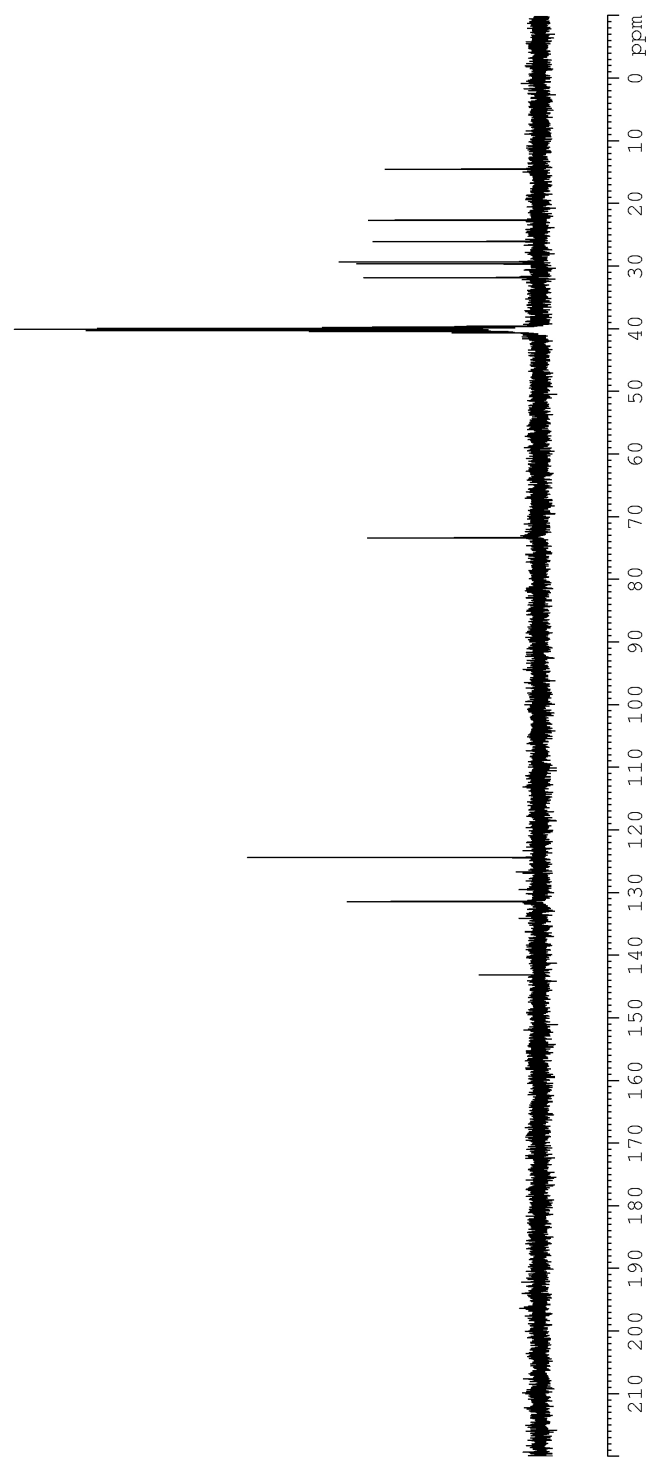

$^{13}\text{C}$  NMR Spectrum of 4-(1-Hydroxyoctyl)phenyl Trifluoroborate (**6**)

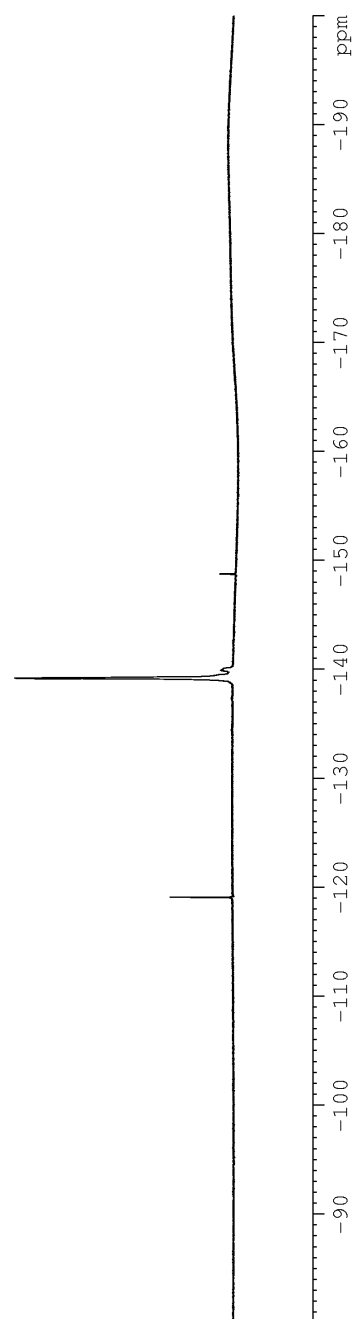

$^{19}\text{F}$  NMR Spectrum of 4-(1-Hydroxyoctyl)phenyl Trifluoroborate (**6**)



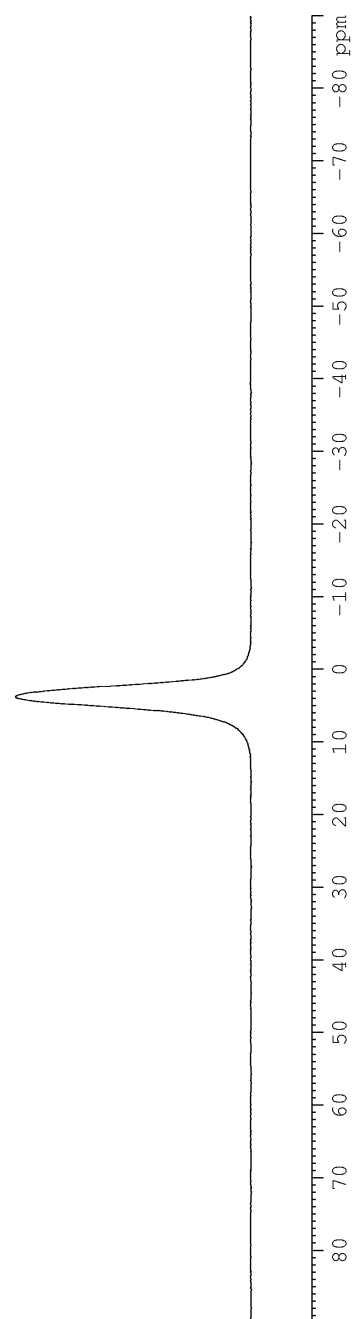

$^{11}\text{B}$  NMR Spectrum of 4-(1-Hydroxyoctyl)phenyl Trifluoroborate (**6**)

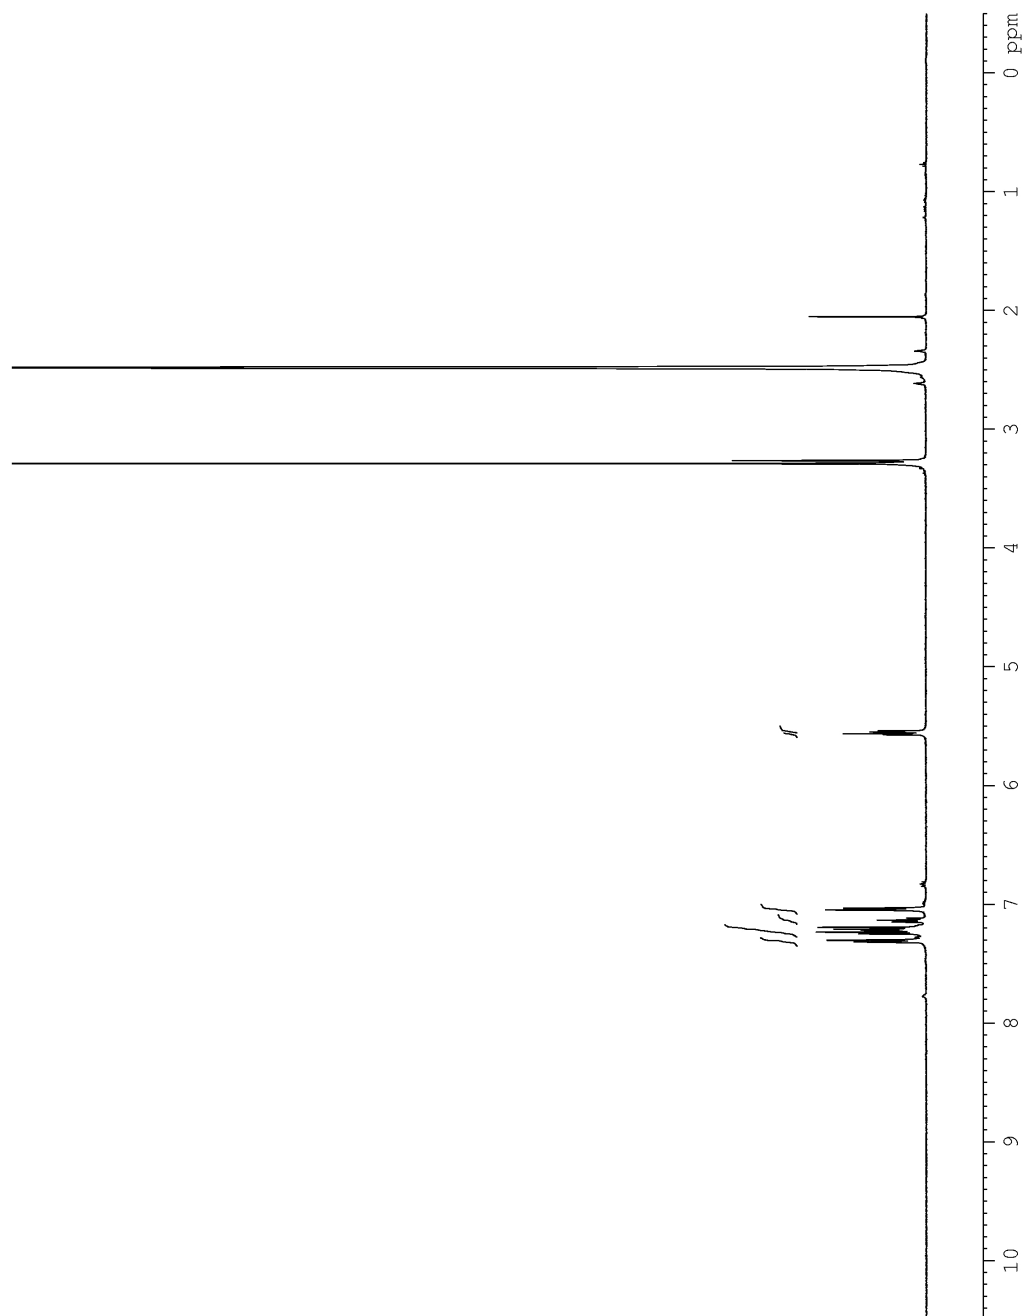

$^1\text{H}$  NMR spectrum of 4-(Hydroxy(phenyl)methyl)phenyl Trifluoroborate (**8**)

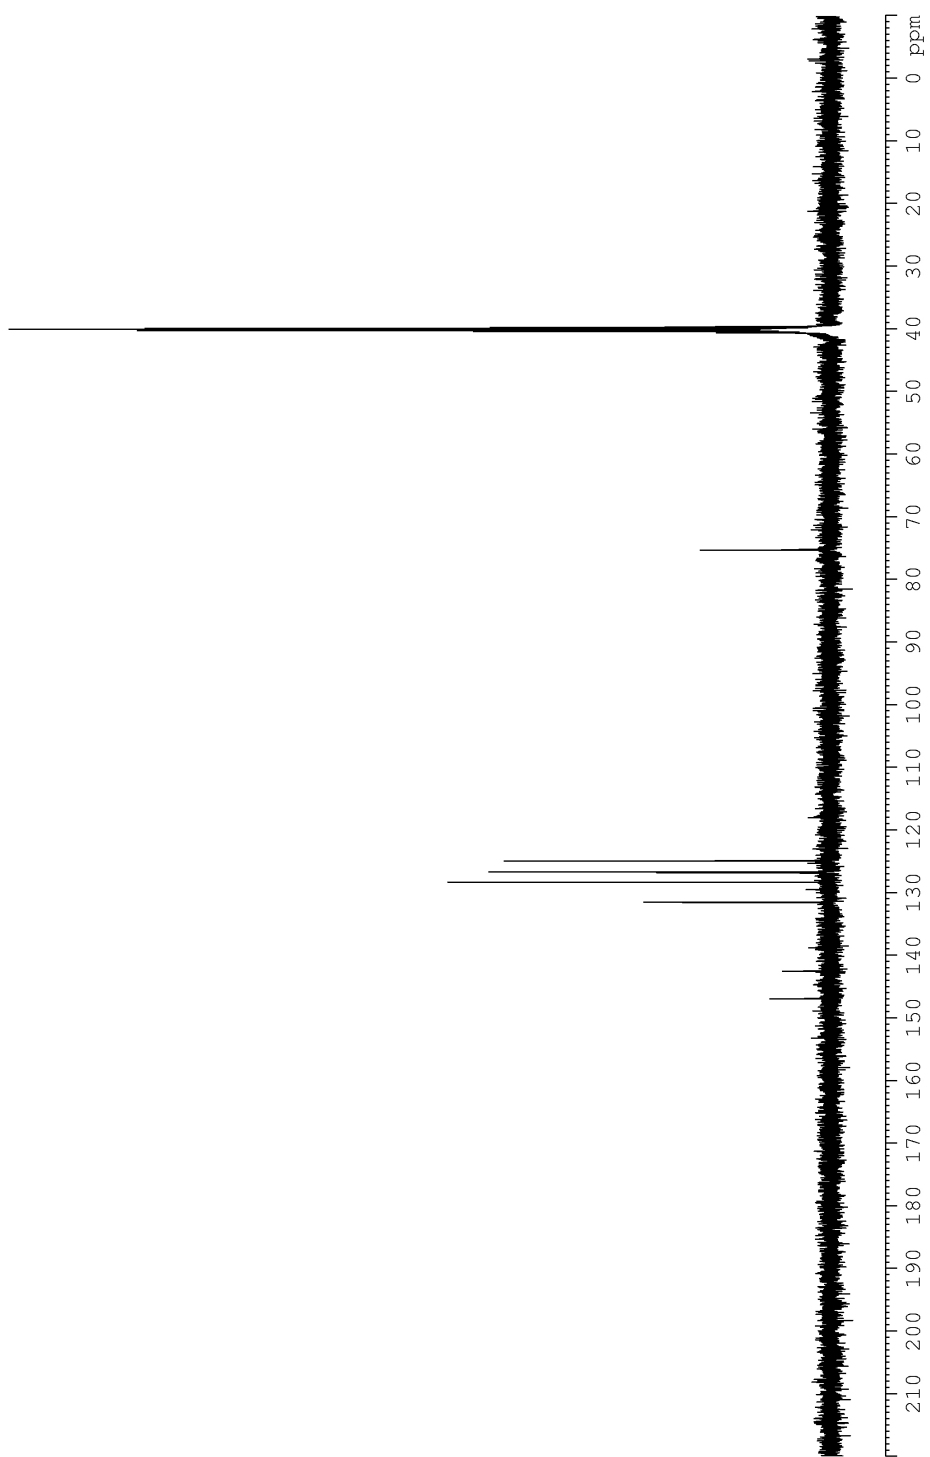

$^{13}\text{C}$  NMR spectrum of 4-(Hydroxy(phenyl)methyl)phenyl Trifluoroborate (**8**)

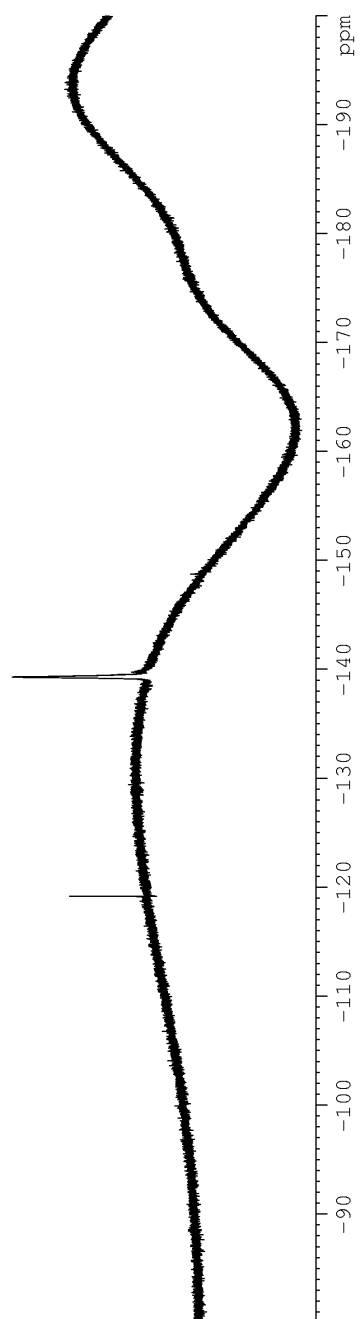

$^{19}\text{F}$  NMR spectrum of 4-(Hydroxy(phenyl)methyl)phenyl Trifluoroborate (**8**)

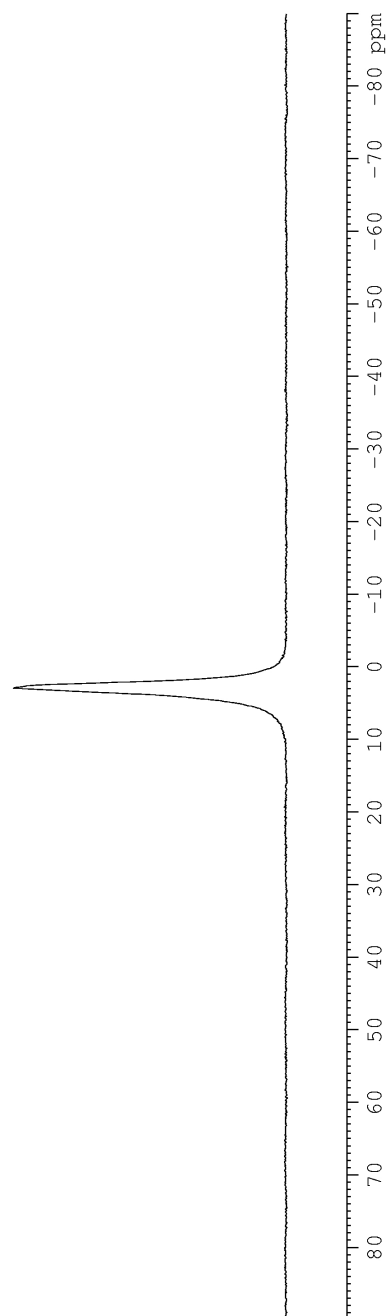

$^{11}\text{B}$  NMR spectrum of 4-(Hydroxy(phenyl)methyl)phenyl Trifluoroborate (**8**)

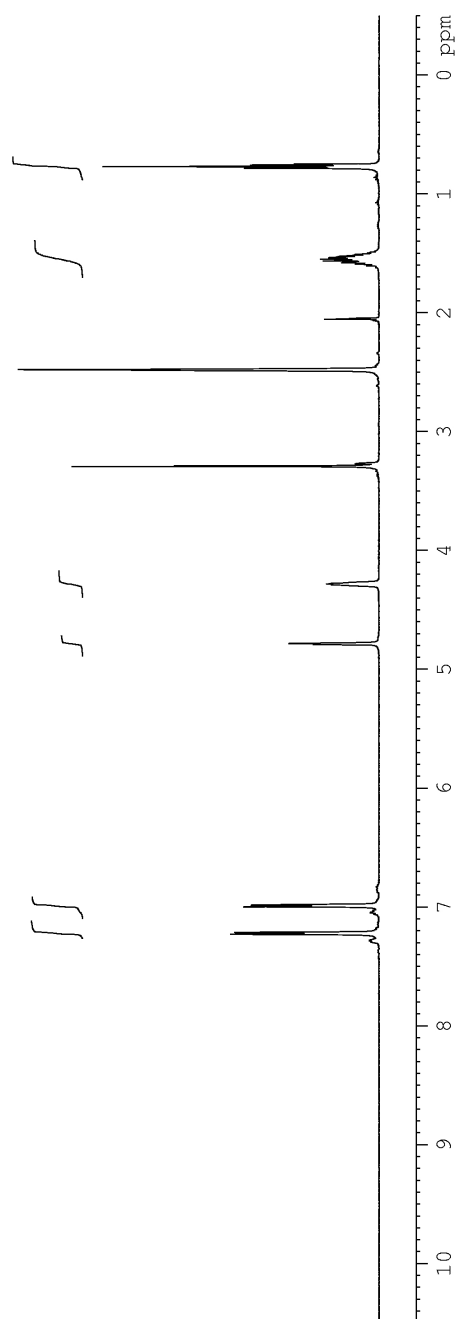

$^1\text{H}$  NMR spectrum of 4-(1-Hydroxypropyl)phenyl Trifluoroborate (**10**)

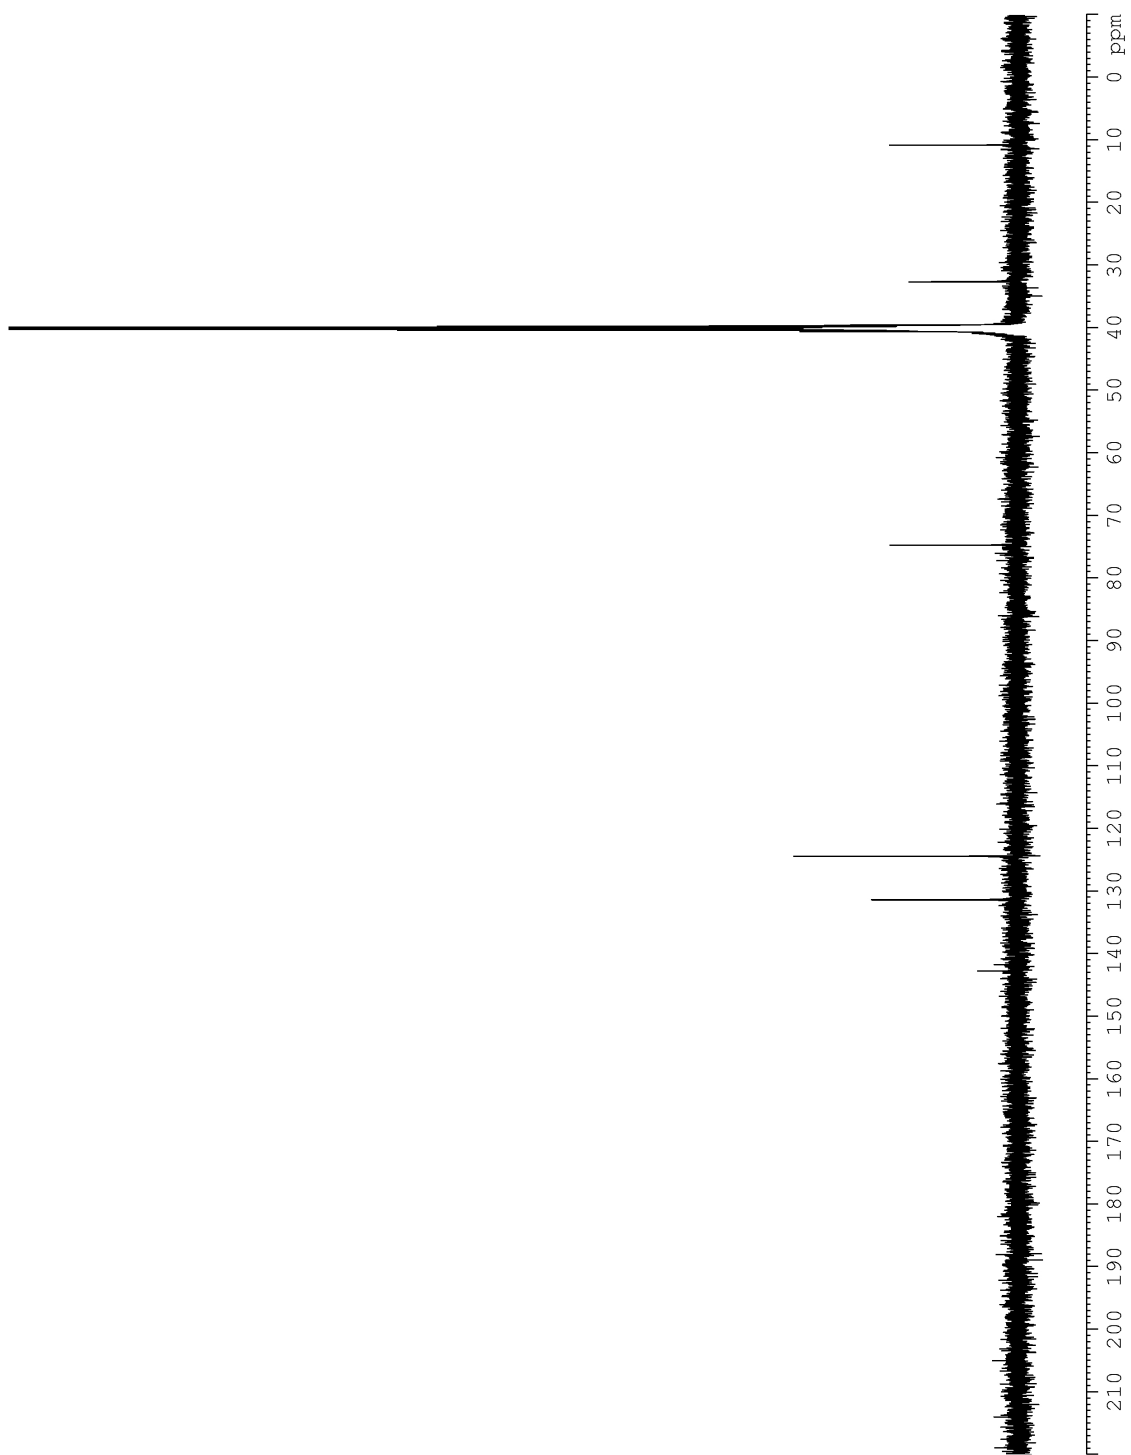

$^{13}\text{C}$  NMR spectrum of 4-(1-Hydroxypropyl)phenyl Trifluoroborate (**10**)

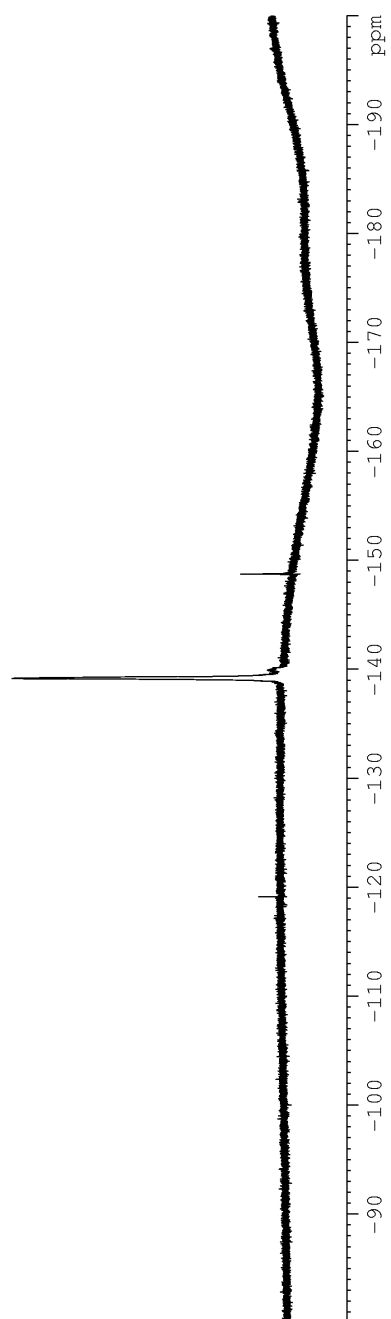

$^{19}\text{F}$  NMR spectrum of 4-(1-Hydroxypropyl)phenyl Trifluoroborate (**10**)



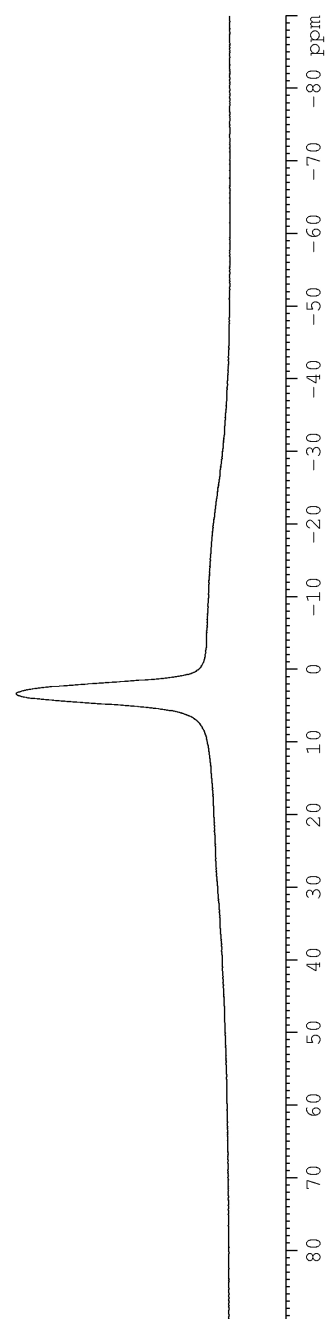

$^{11}\text{B}$  NMR spectrum of 4-(1-Hydroxypropyl)phenyl Trifluoroborate (**10**)

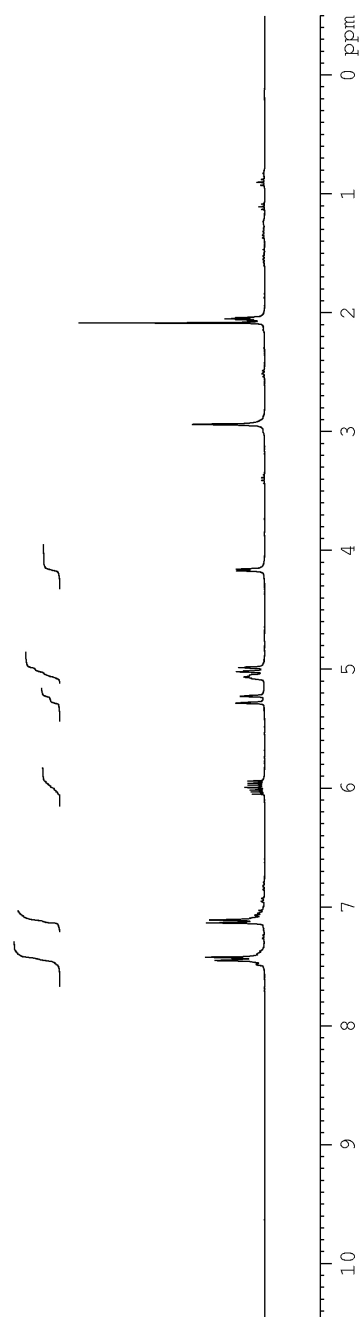

$^1\text{H}$  NMR spectrum of 4-(1-Hydroxyallyl)phenyl Trifluoroborate (**12**)

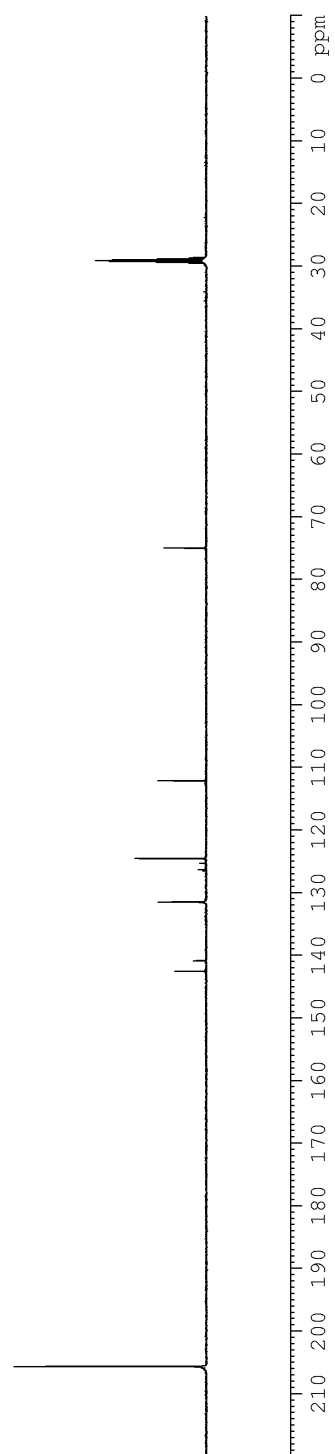

$^{13}\text{C}$  NMR spectrum of 4-(1-Hydroxyallyl)phenyl Trifluoroborate (**12**)

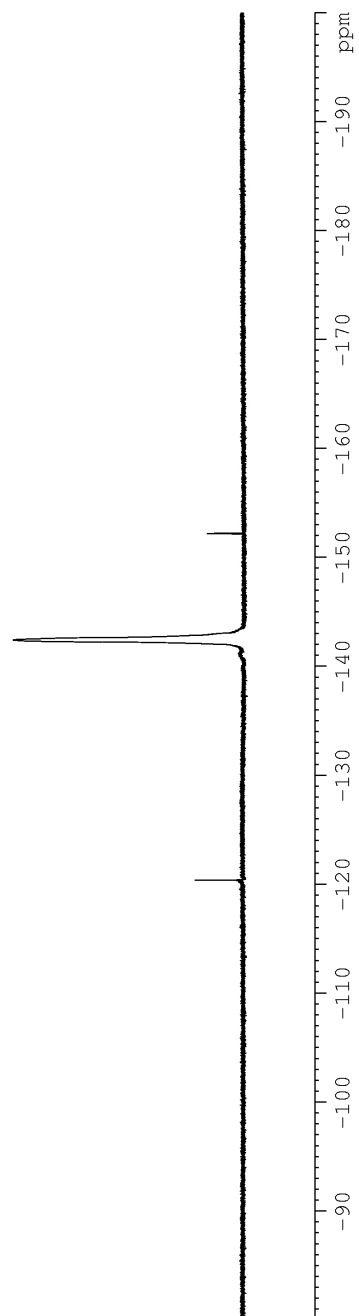

$^{19}\text{F}$  NMR spectrum of 4-(1-Hydroxyallyl)phenyl Trifluoroborate (**12**)

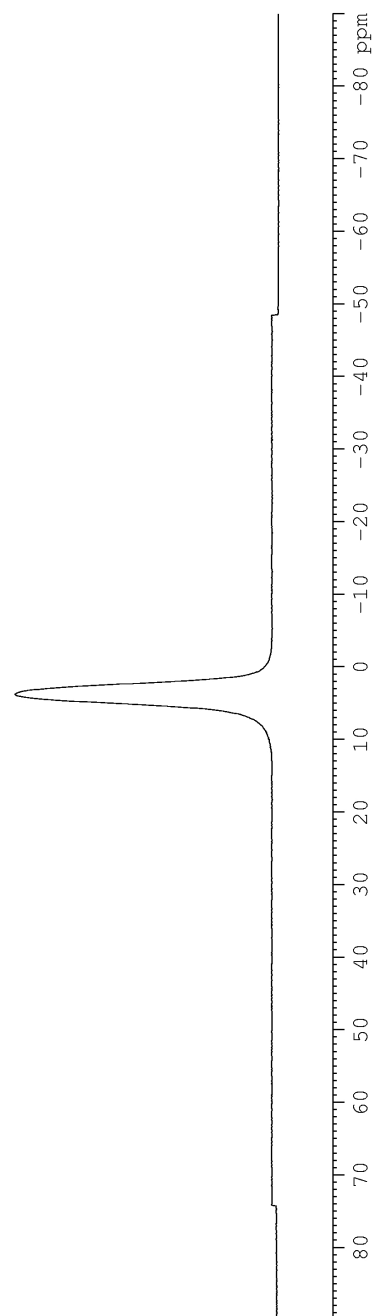

$^{11}\text{B}$  NMR spectrum of 4-(1-Hydroxyallyl)phenyl Trifluoroborate (**12**)

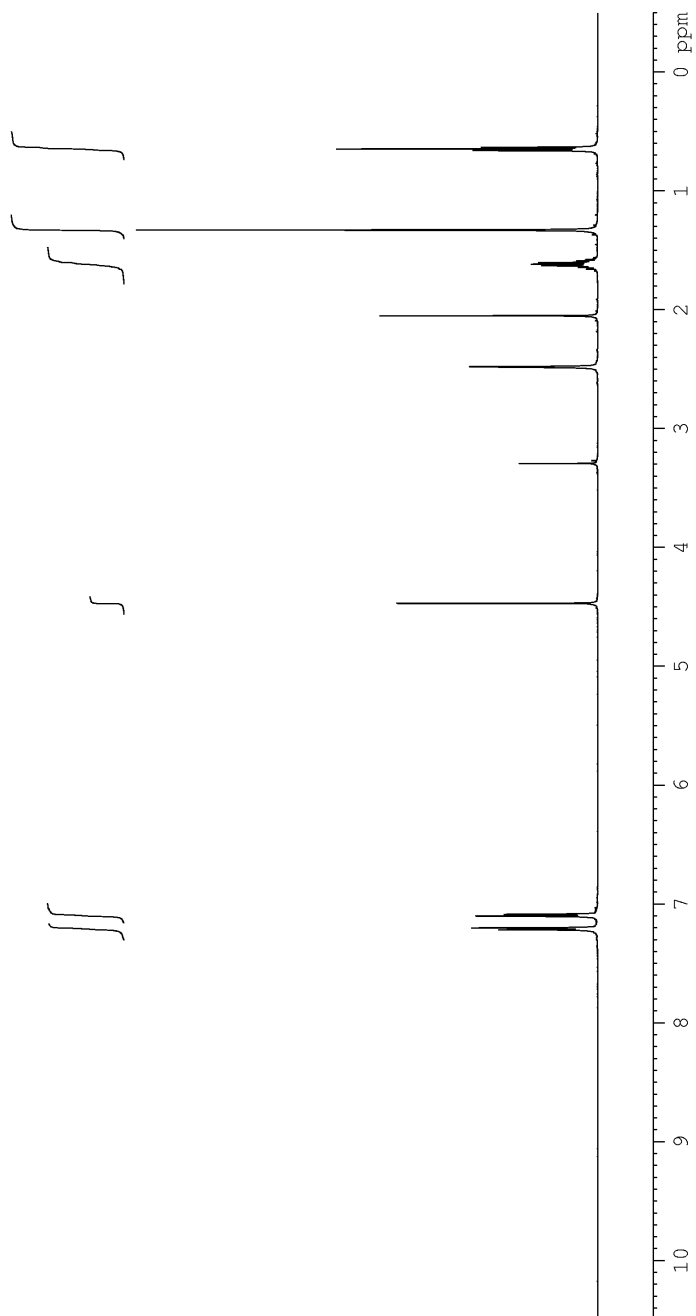

$^1\text{H}$  NMR spectrum of 4-(2-Hydroxy-2-butanyl)phenyl Trifluoroborate (**14**)

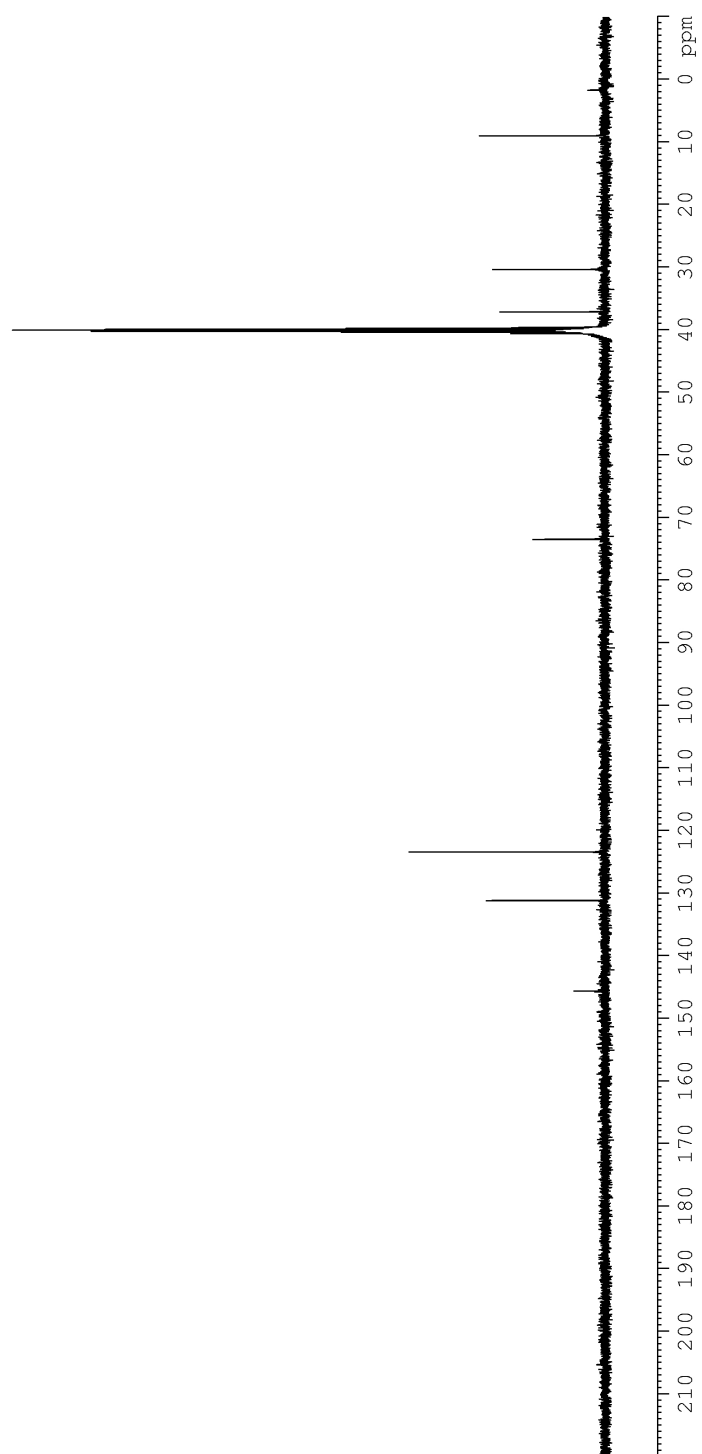

$^{13}\text{C}$  NMR spectrum of 4-(2-Hydroxy-2-butanyl)phenyl Trifluoroborate (**14**)

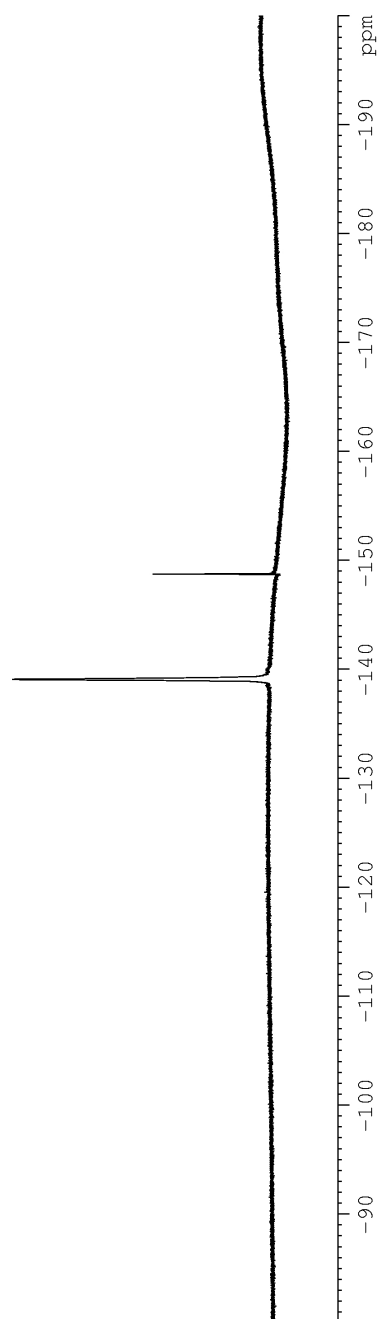

$^{19}\text{F}$  NMR spectrum of 4-(2-Hydroxy-2-butanyl)phenyl Trifluoroborate (**14**)



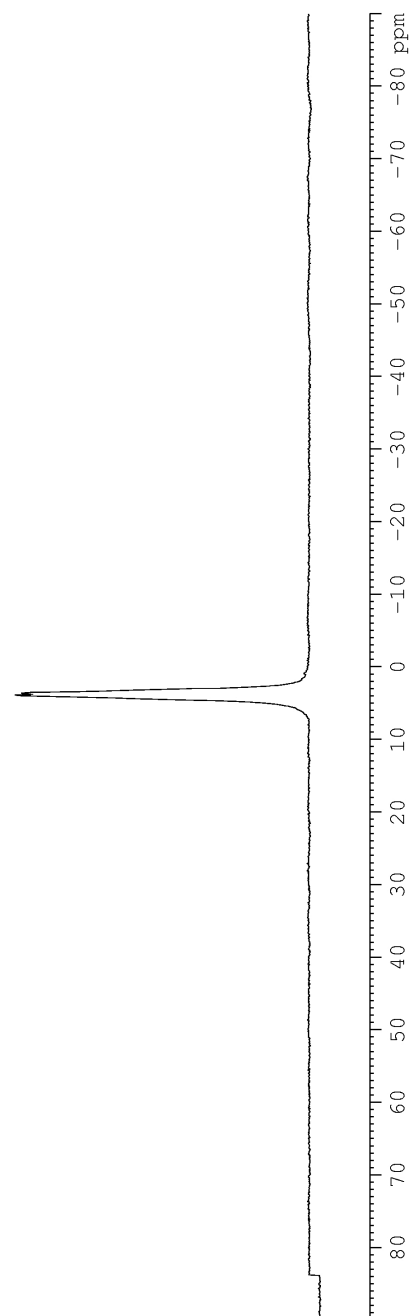

$^{11}\text{B}$  NMR spectrum of 4-(2-Hydroxy-2-butanyl)phenyl Trifluoroborate (**14**)

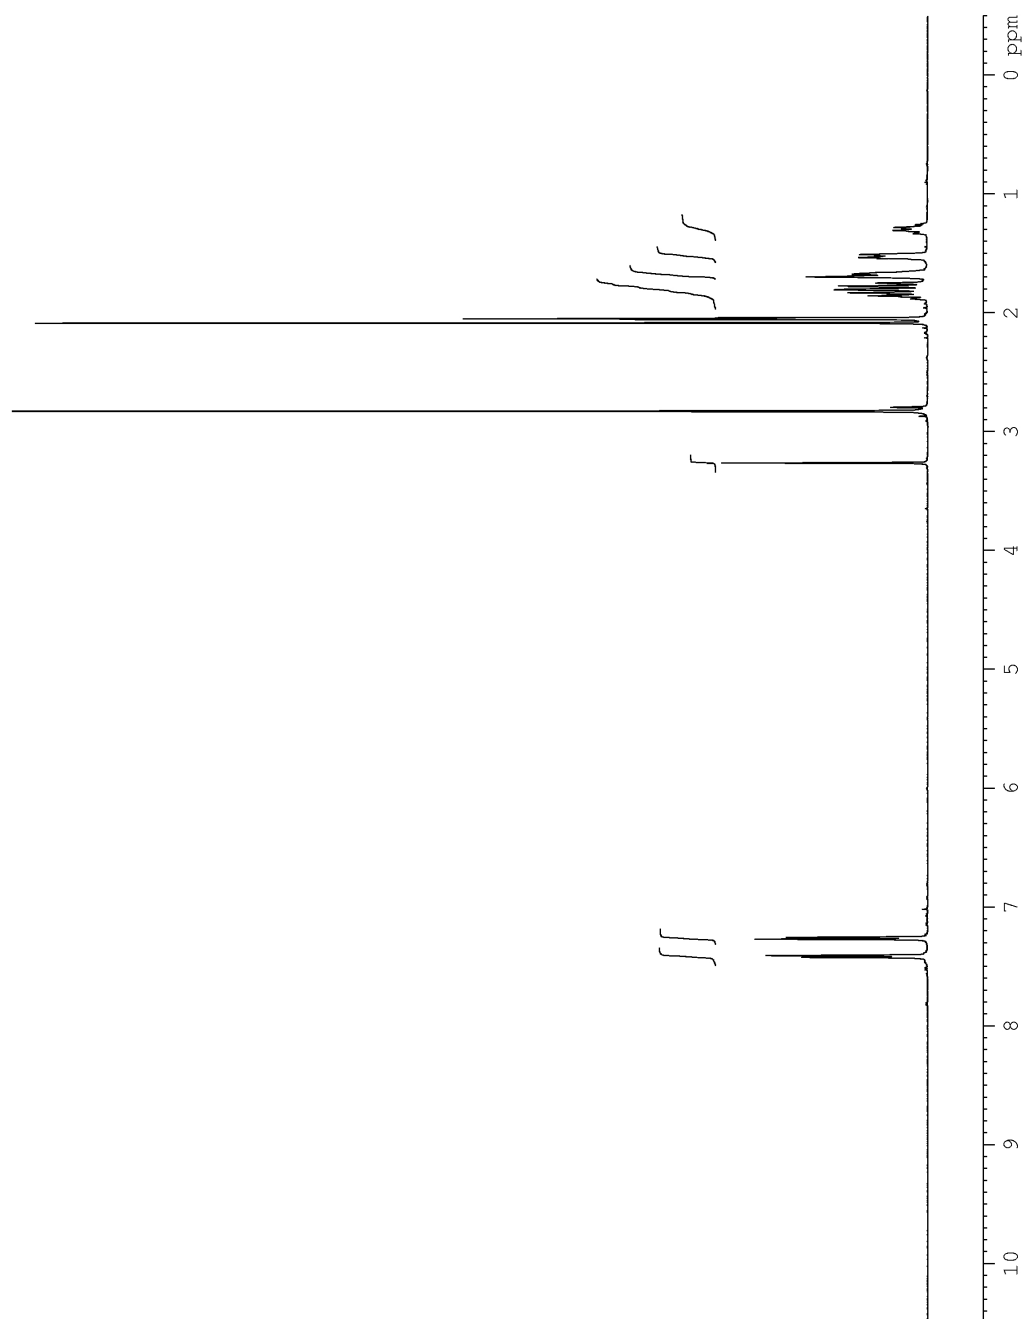

$^1\text{H}$  NMR spectrum of 4-(Hydroxycyclohexyl)phenyl Trifluoroborate (**16**)

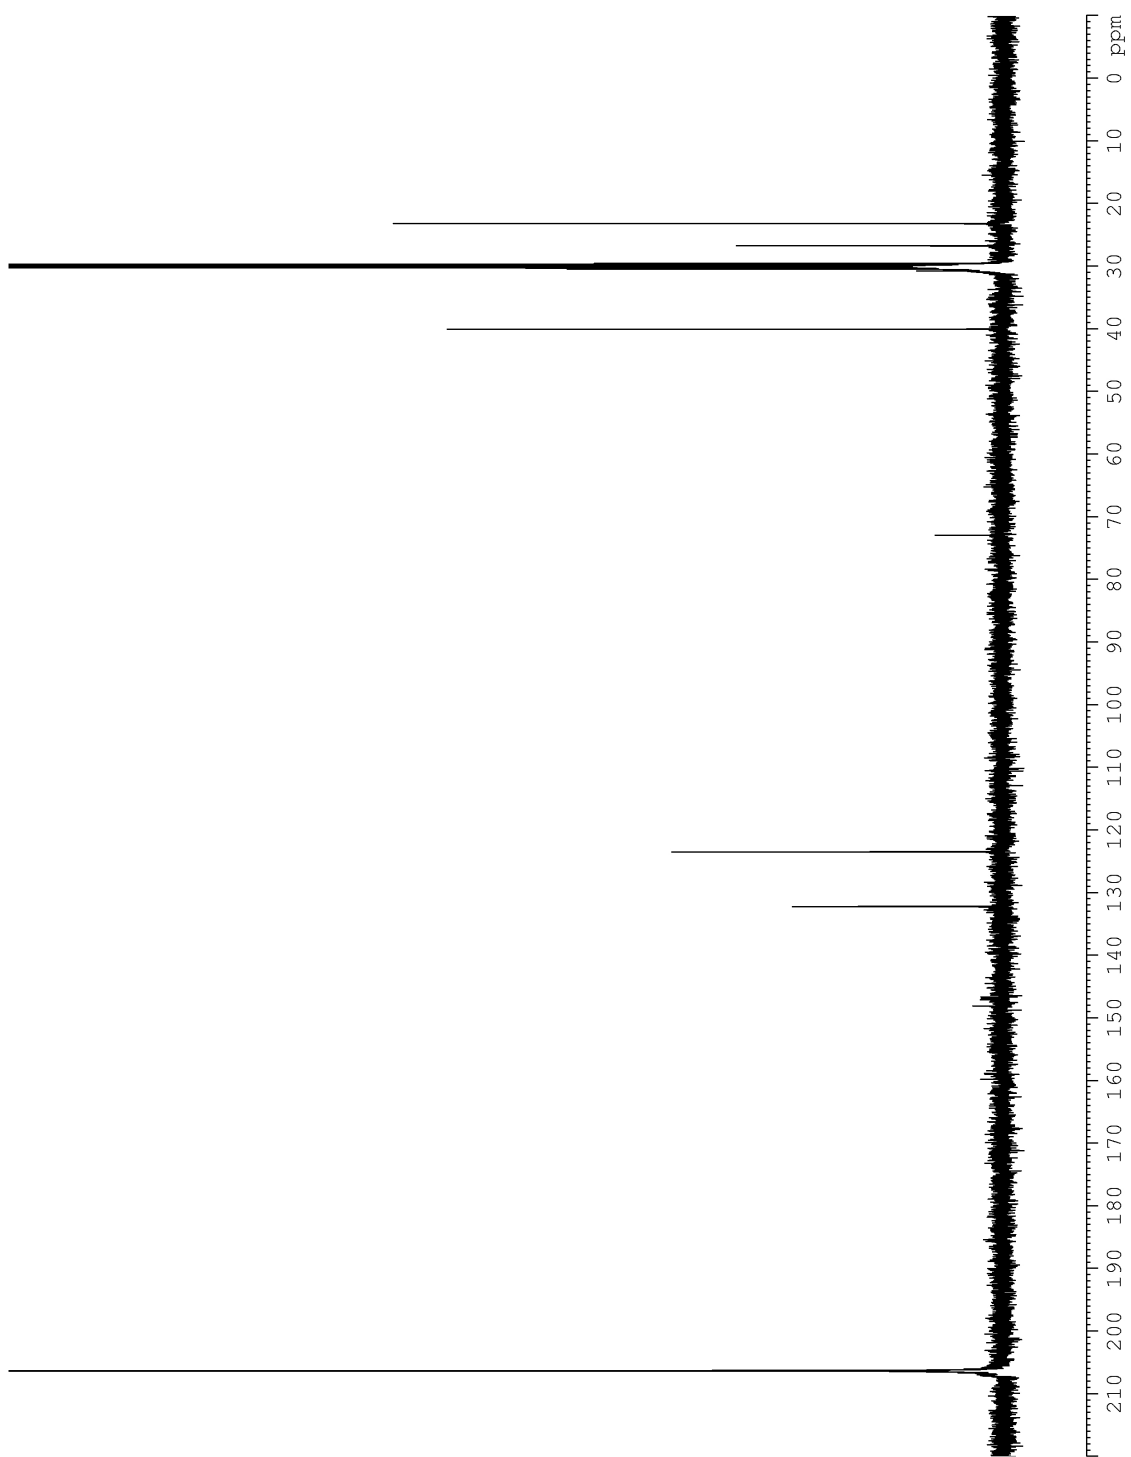

$^{13}\text{C}$  NMR spectrum of 4-(Hydroxycyclohexyl)phenyl Trifluoroborate (**16**)

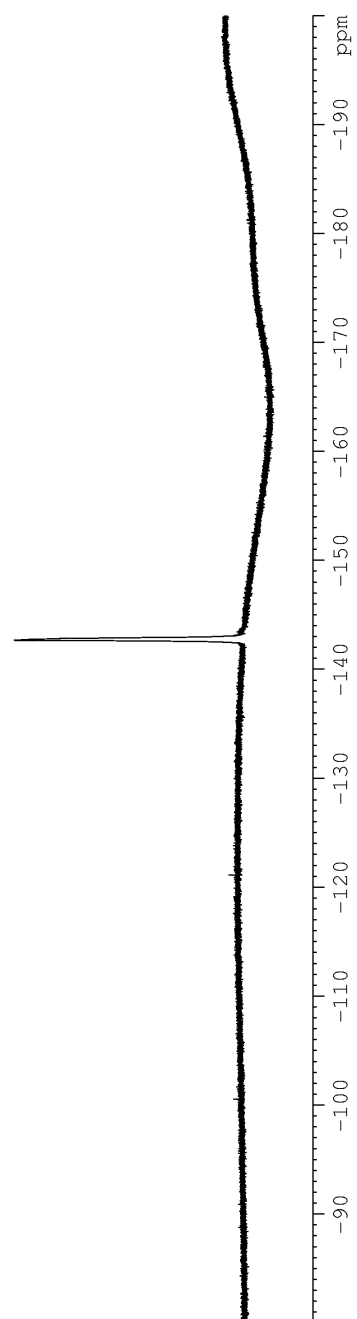

$^{19}\text{F}$  NMR spectrum of 4-(Hydroxycyclohexyl)phenyl Trifluoroborate (**16**)

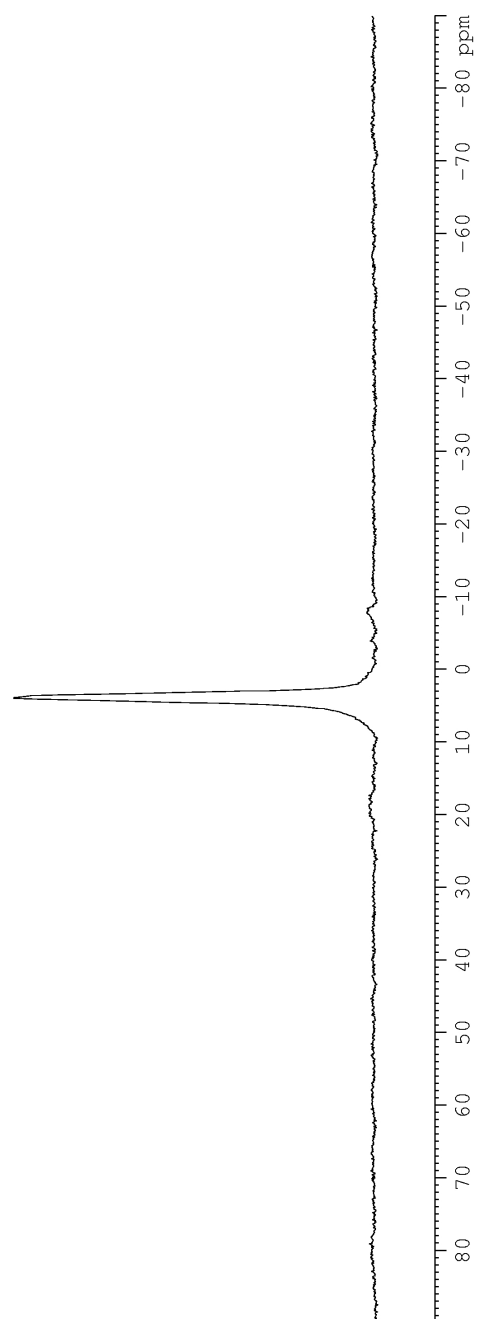

$^{11}\text{B}$  NMR spectrum of 4-(Hydroxycyclohexyl)phenyl Trifluoroborate (**16**)

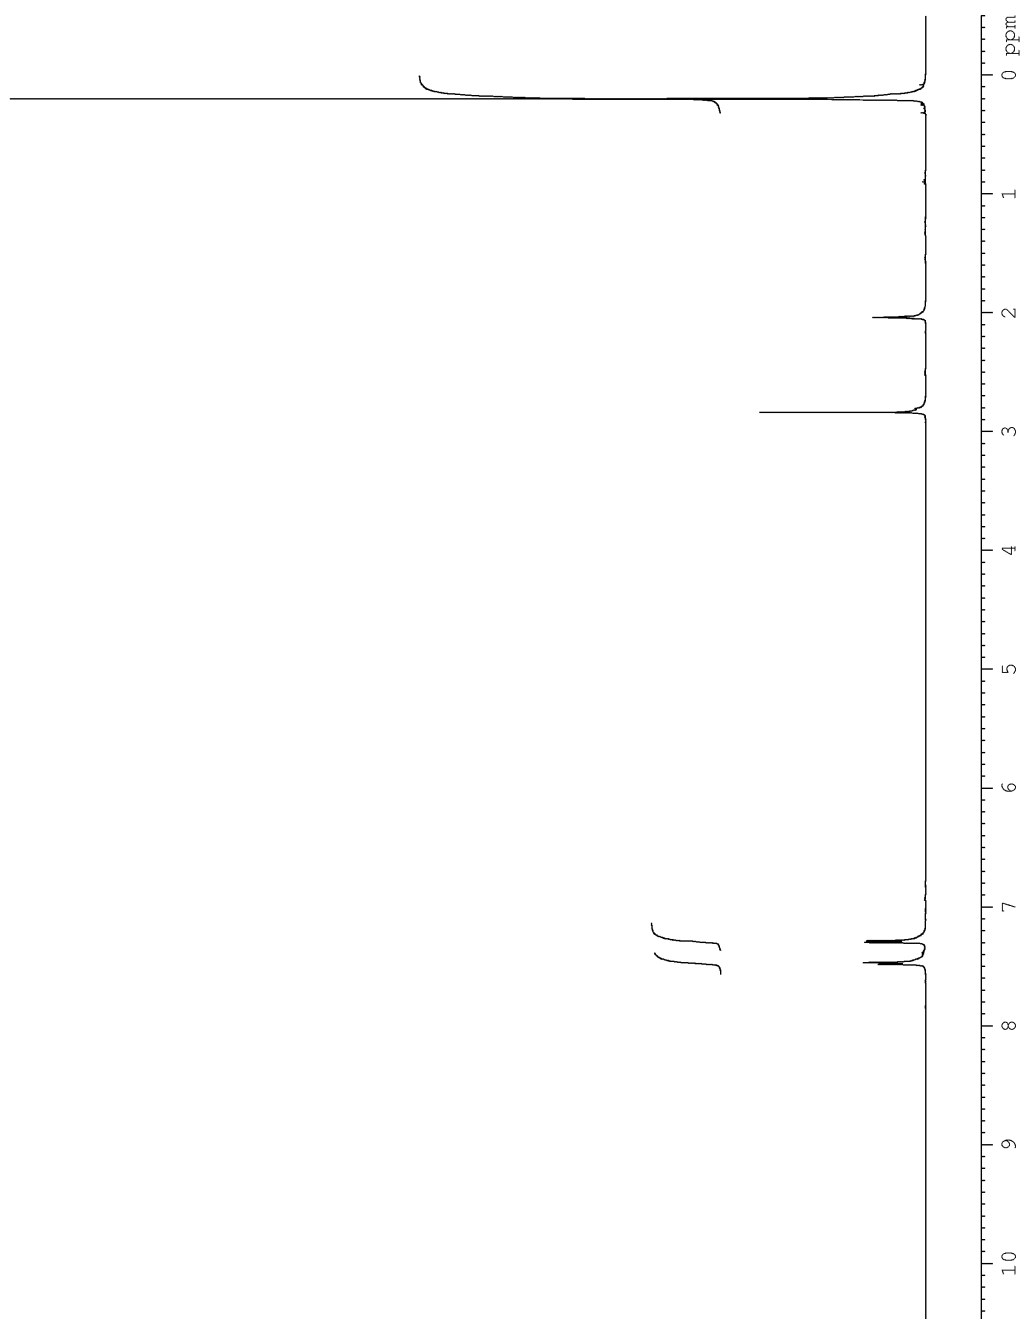

$^1\text{H}$  NMR spectrum of 4-(Trimethylsilyl)phenyl Trifluoroborate (**18**)

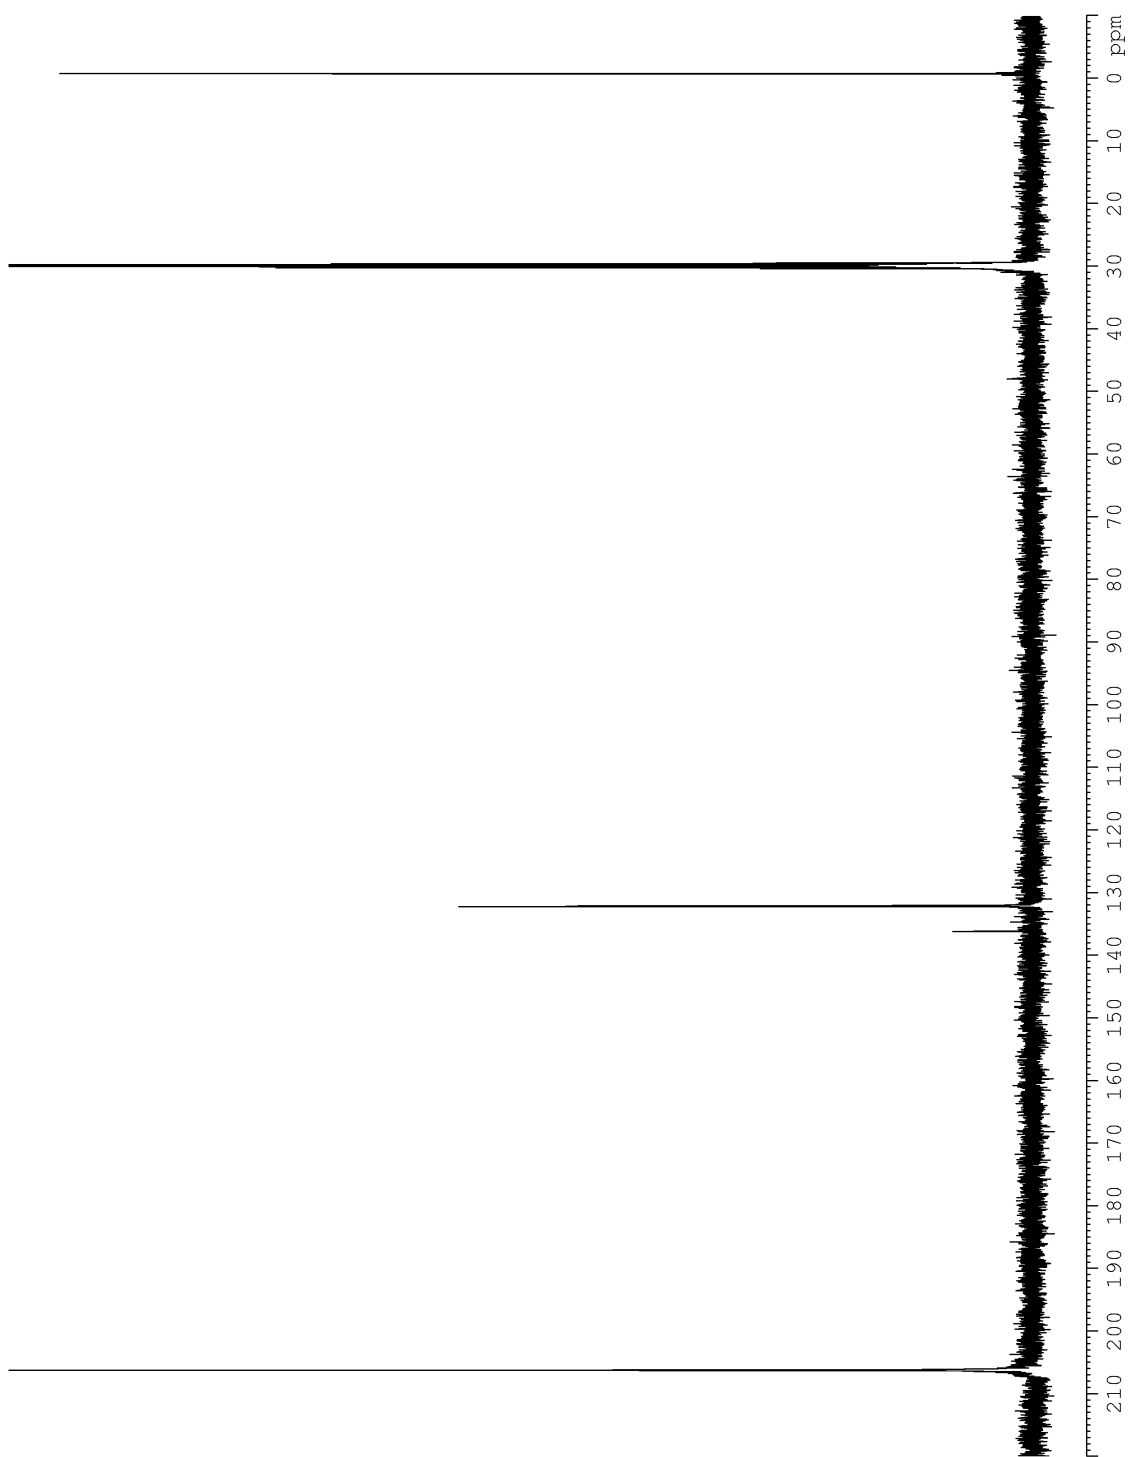

$^{13}\text{C}$  NMR spectrum of 4-(Trimethylsilyl)phenyl Trifluoroborate (**18**)

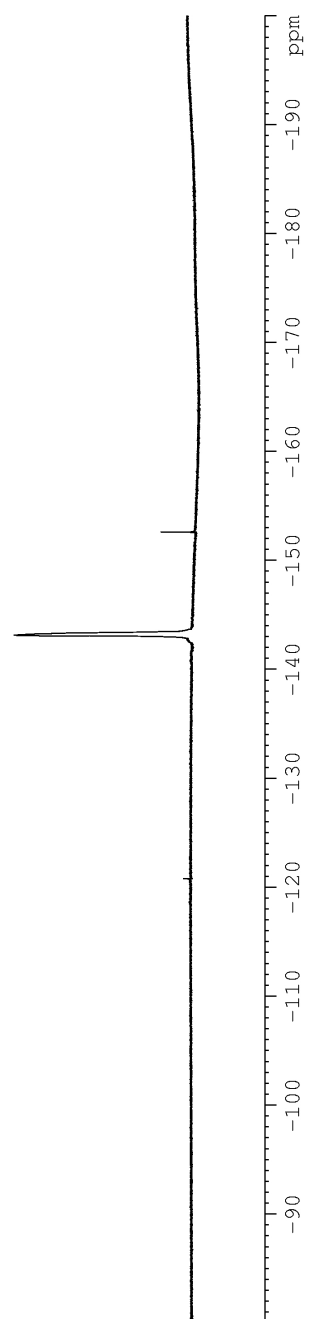

$^{19}\text{F}$  NMR spectrum of 4-(Trimethylsilyl)phenyl Trifluoroborate (**18**)



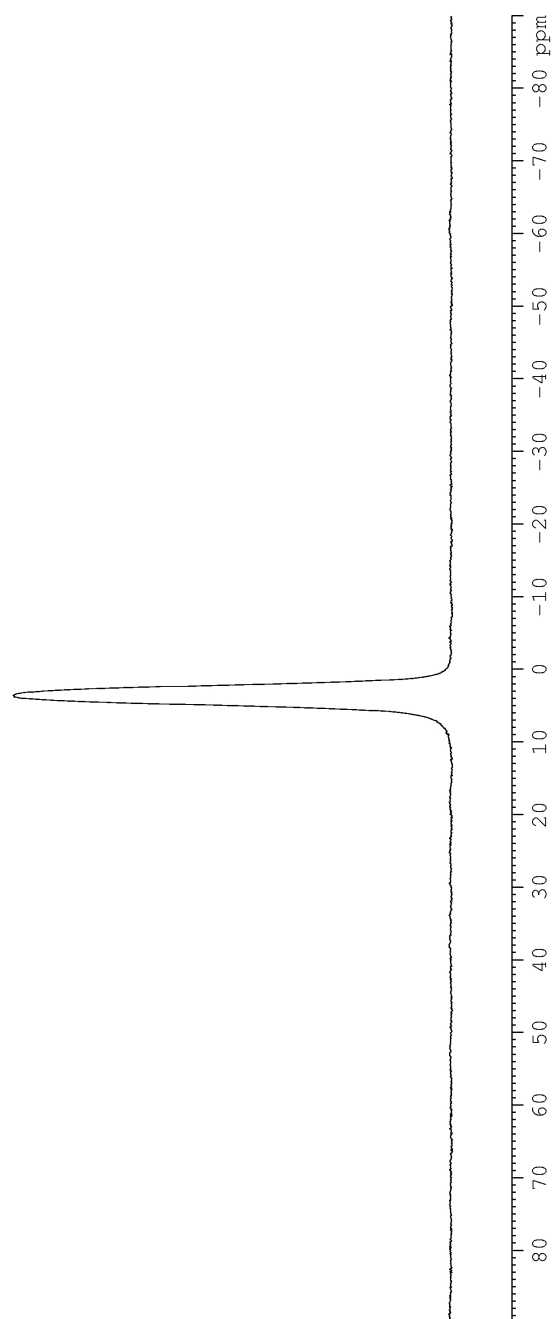

$^{11}\text{B}$  NMR spectrum of 4-(Trimethylsilyl)phenyl Trifluoroborate (**18**)

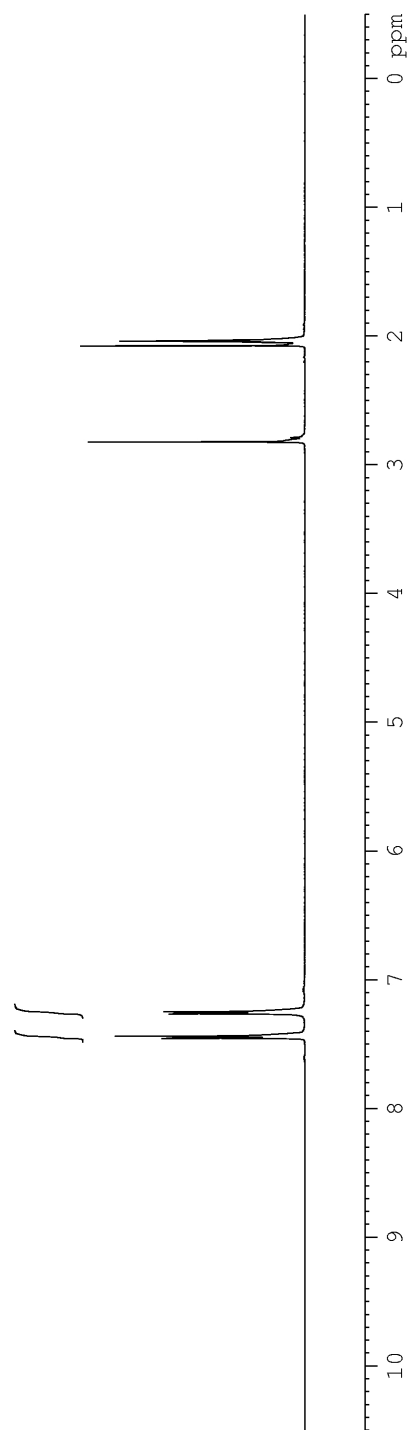

$^1\text{H}$  NMR spectrum of 4-Iodophenyl Trifluoroborate (**20**)

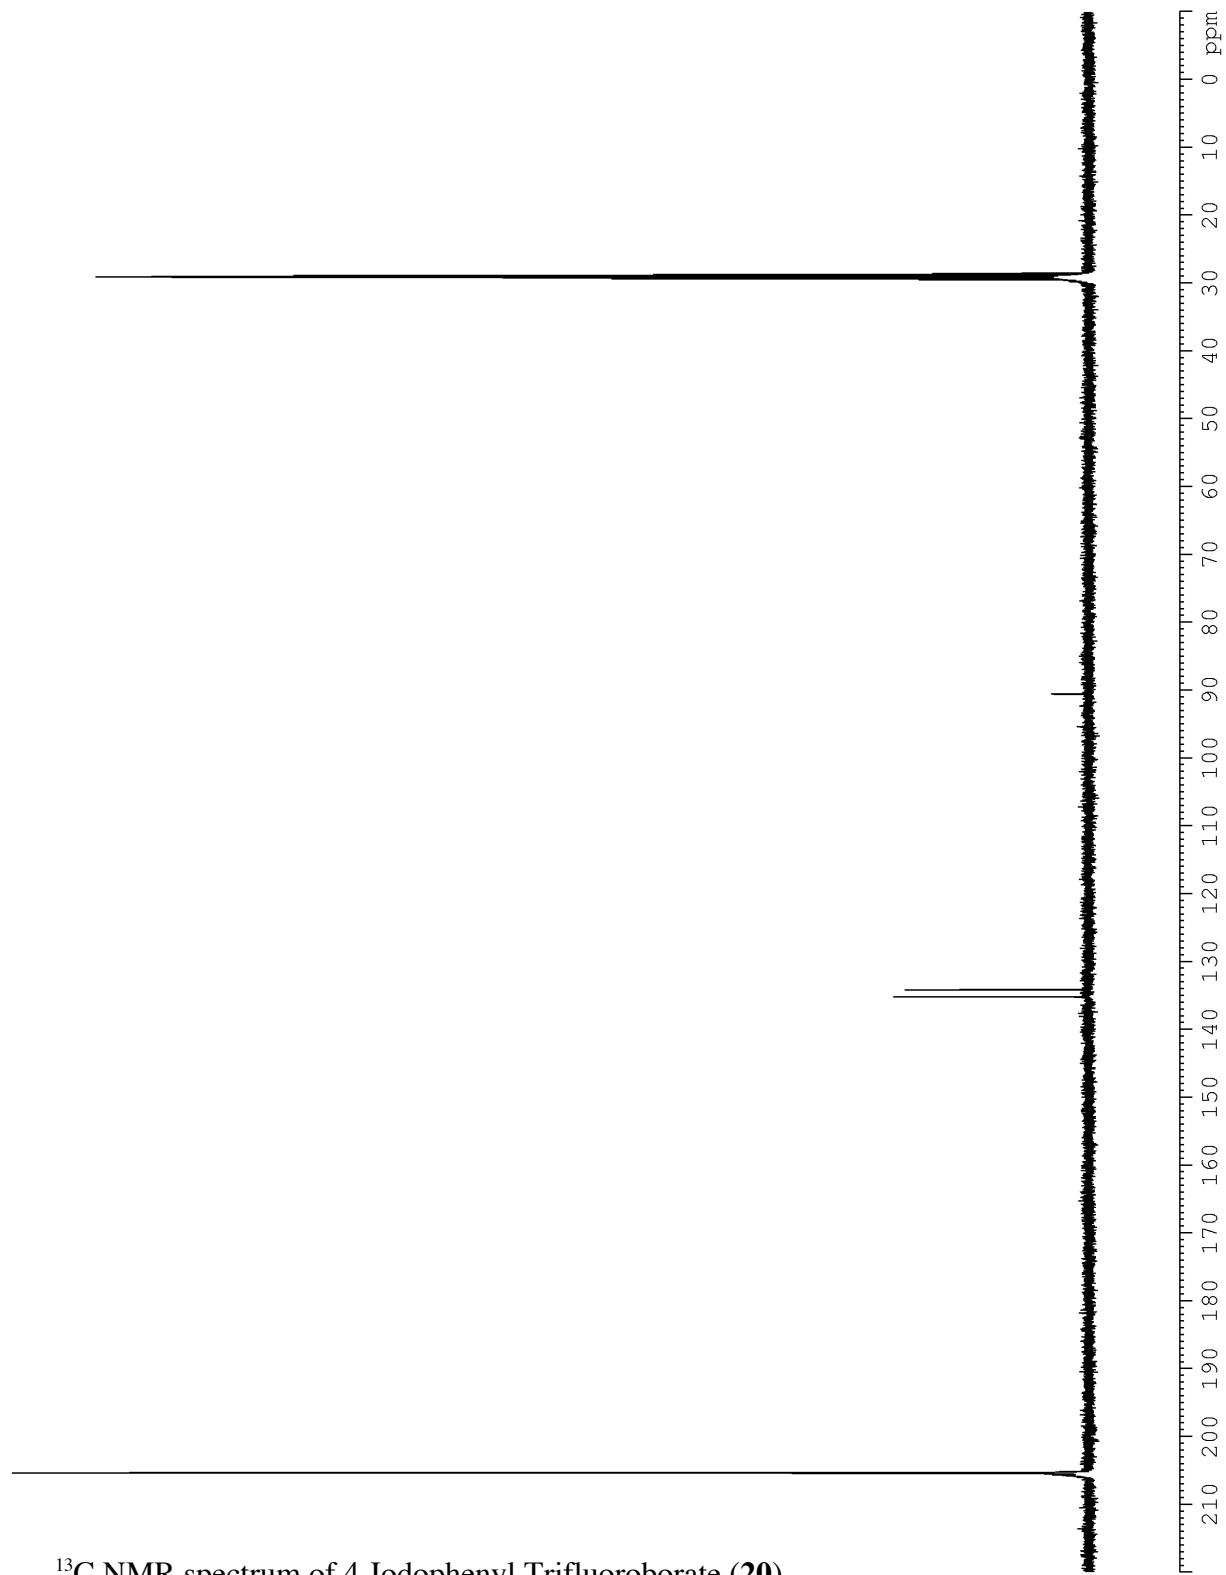

$^{19}\text{F}$  NMR spectrum of 4-Iodophenyl Trifluoroborate (**20**)

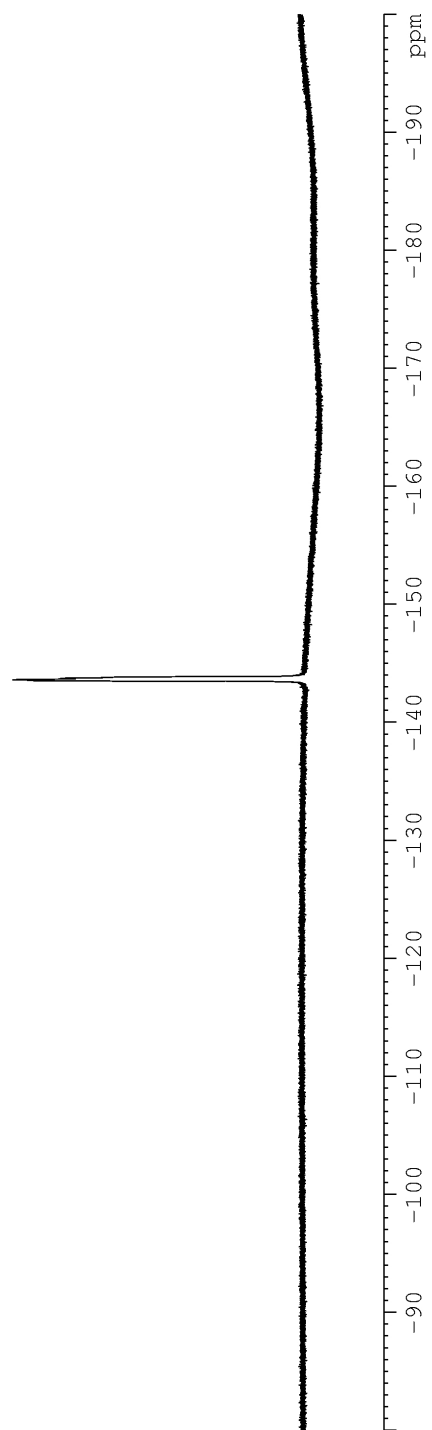

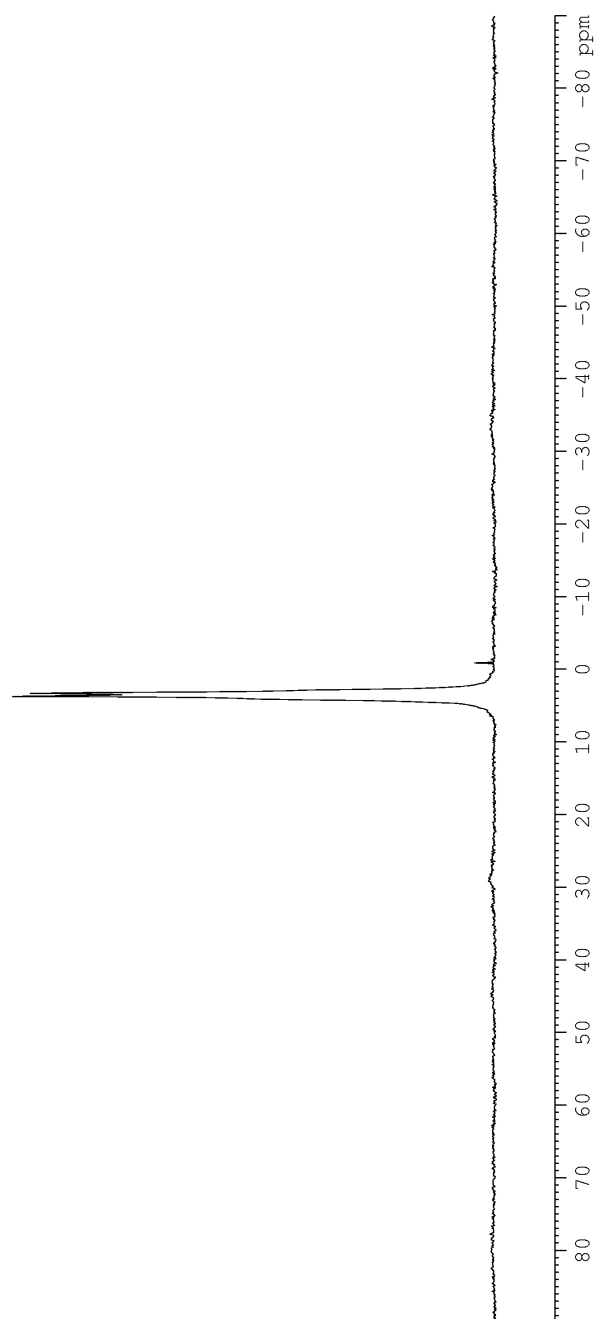

$^{11}\text{B}$  NMR spectrum of 4-Iodophenyl Trifluoroborate (**20**)

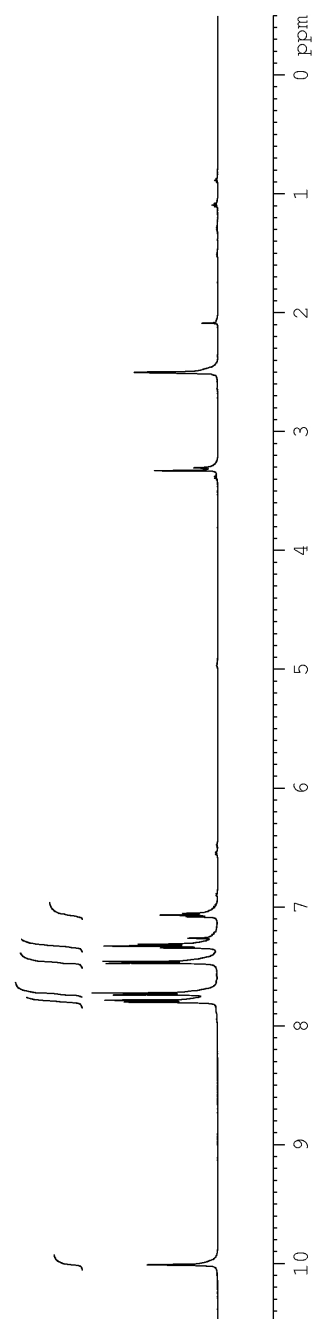

$^1\text{H}$  NMR spectrum of 4-(Phenylcarbamoyl)phenyl Trifluoroborate (**22**)

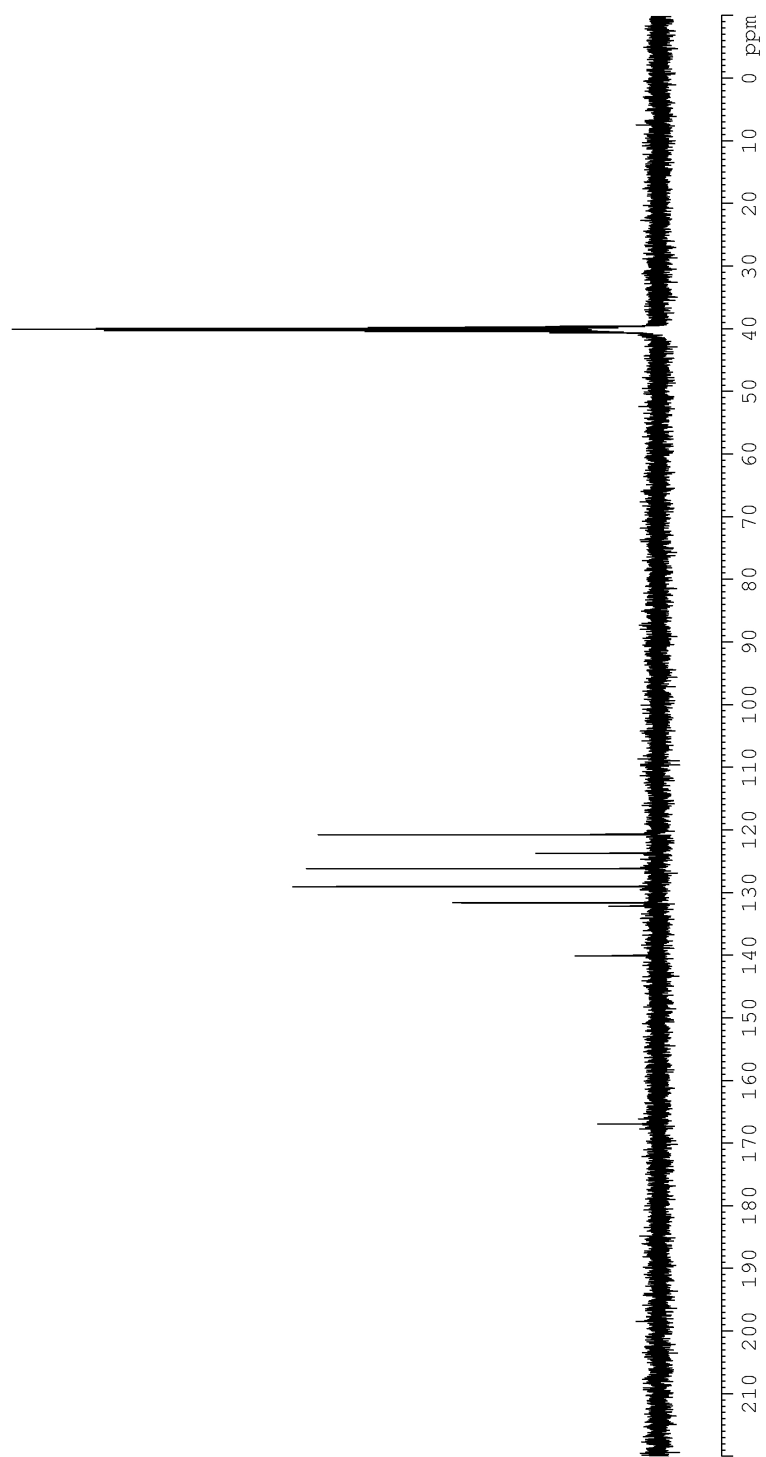

$^{13}\text{C}$  NMR spectrum of 4-(Phenylcarbamoyl)phenyl Trifluoroborate (**22**)

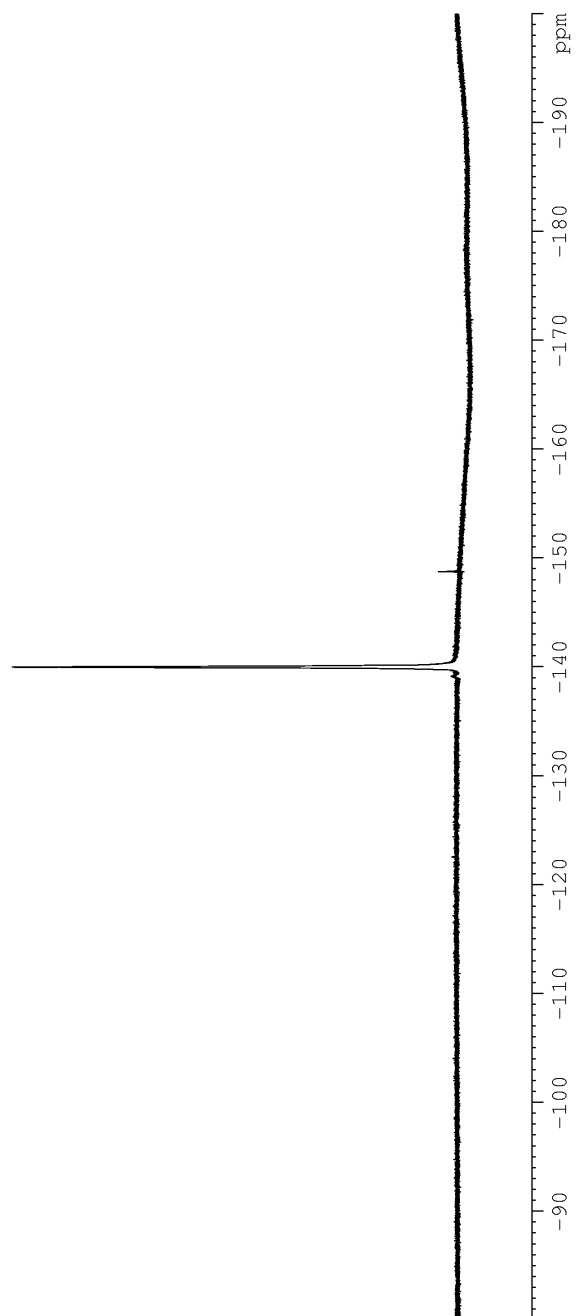

$^{19}\text{F}$  NMR spectrum of 4-(Phenylcarbamoyl)phenyl Trifluoroborate (**22**)



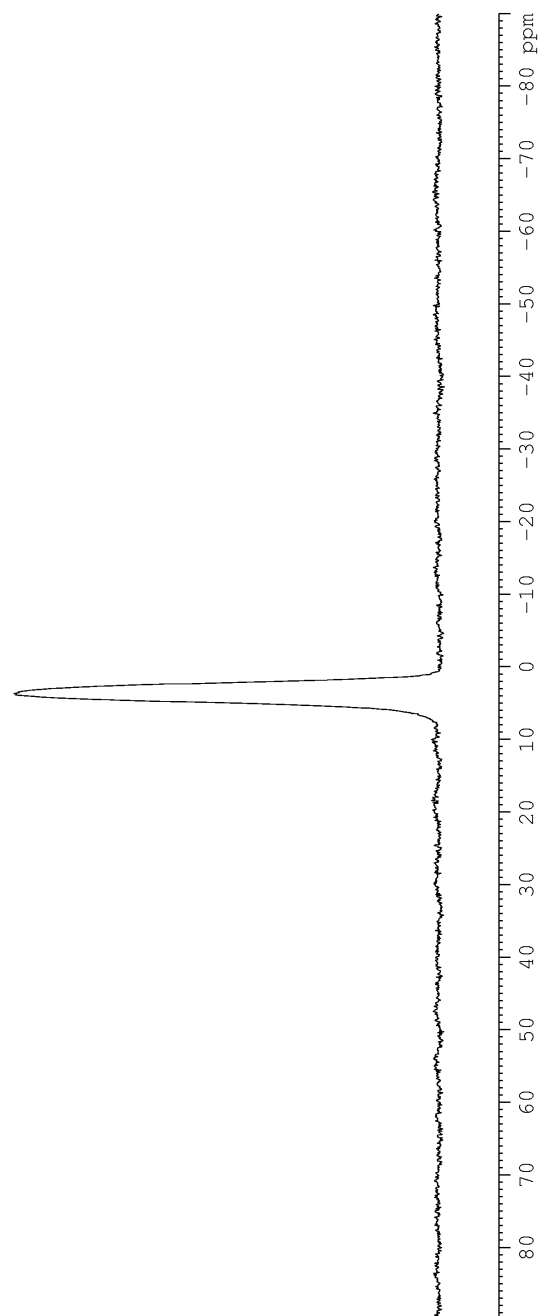

$^{11}\text{B}$  NMR spectrum of 4-(Phenylcarbamoyl)phenyl Trifluoroborate (**22**)

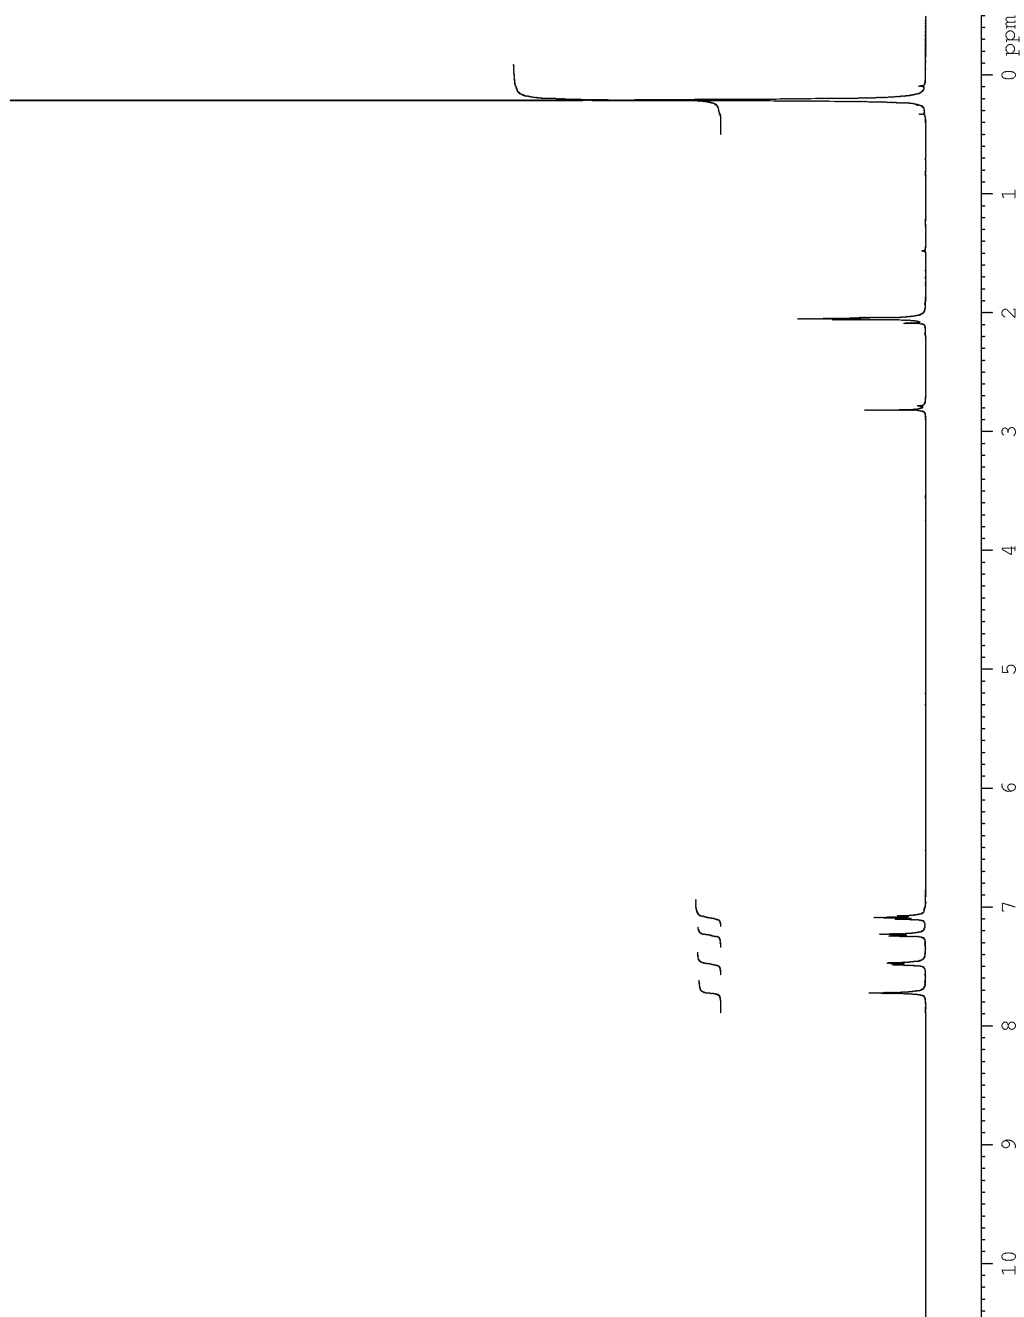

$^1\text{H}$  NMR spectrum of 3-(Trimethylsilyl)phenyl Trifluoroborate (**24**)

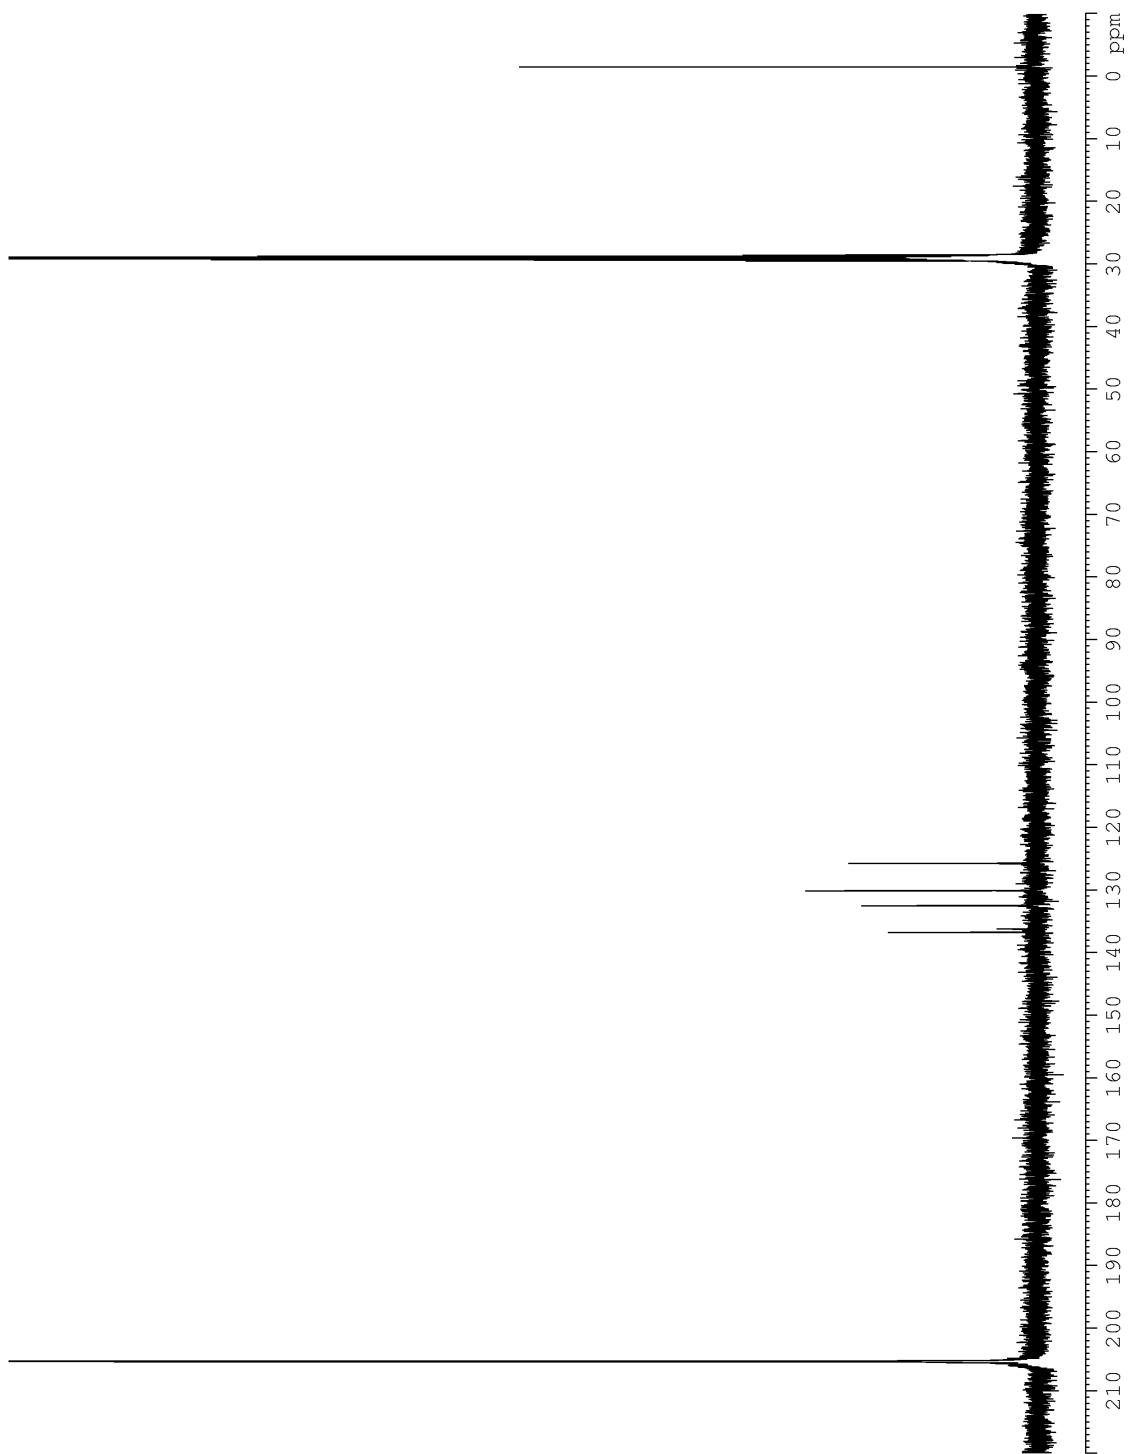

$^{13}\text{C}$  NMR spectrum of 3-(Trimethylsilyl)phenyl Trifluoroborate (**24**)

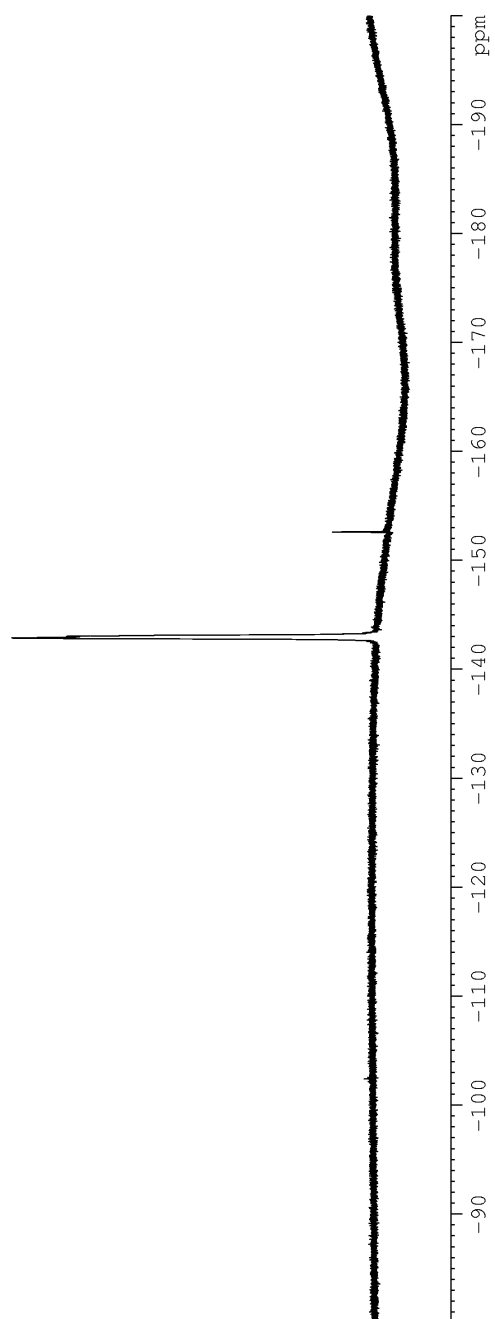

$^{19}\text{F}$  NMR spectrum of 3-(Trimethylsilyl)phenyl Trifluoroborate (**24**)

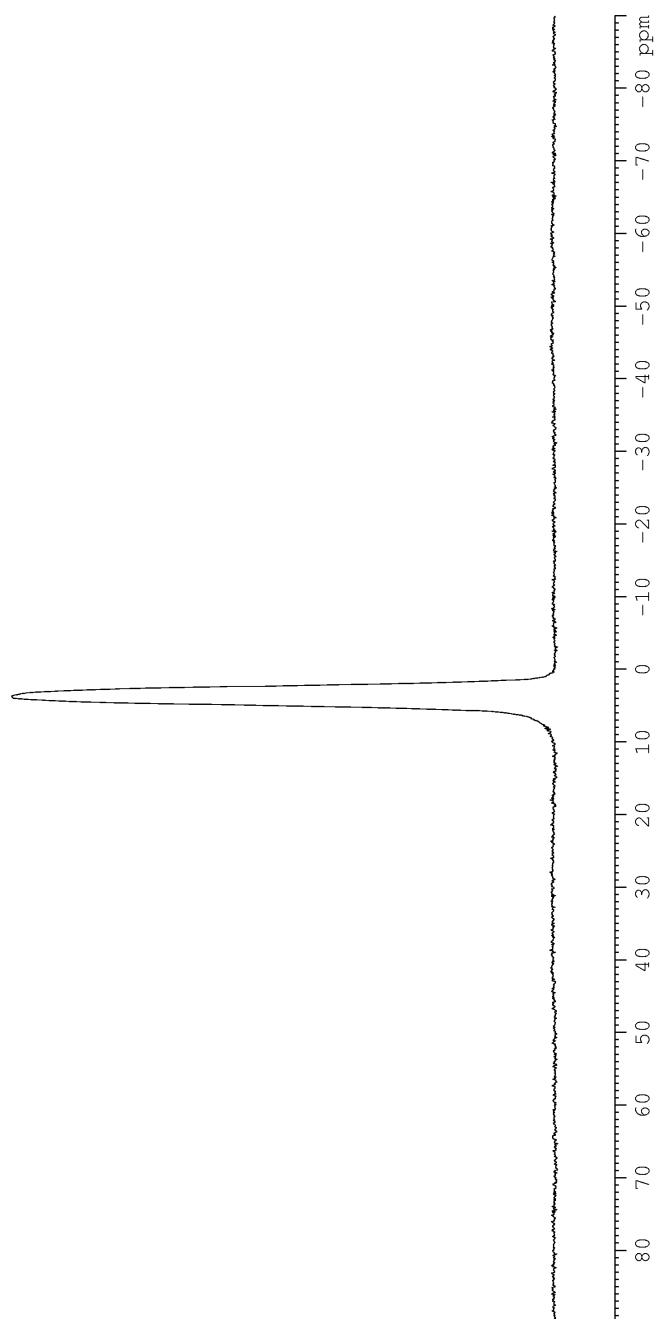

$^{11}\text{B}$  NMR spectrum of 3-(Trimethylsilyl)phenyl Trifluoroborate (**24**)
